1    **Structural requirements for dihydrobenzoxazepinone**  
2    **anthelmintics: actions against medically important and model**  
3    **parasites - *Trichuris muris*, *Brugia malayi* and *Heligmosomoides***  
4    ***polygyrus***

5    Short title: (70 characters) Dihydrobenzoxazepinone efficacy on human and model nematode  
6    parasites

7

8    Authors:

9    Frederick A Partridge<sup>1¶</sup>, Carole JR Bataille<sup>2¶</sup>, Ruth Forman<sup>3¶</sup>, Amy E Marriott<sup>4¶</sup>, Cécile Häberli<sup>5,6¶</sup>, Ria  
10    L Dinsdale<sup>2</sup>, James DB O’Sullivan<sup>3,7</sup>, Nicky J Willis<sup>2,8</sup>, John Archer<sup>4</sup>, Andrew Steven<sup>4</sup>, Mark J  
11    Taylor<sup>4,9</sup>, Jennifer Keiser<sup>5,6</sup>, Joseph D Turner<sup>4,9</sup>, Kathryn J Else<sup>3\*</sup>, Angela J Russell<sup>2,10\*</sup> and David B  
12    Sattelle<sup>1\*</sup>

13    <sup>1</sup>Centre for Respiratory Biology, UCL Respiratory, Division of Medicine, University College London,  
14    London, United Kingdom

15    <sup>2</sup>Department of Chemistry, Chemistry Research Laboratory, University of Oxford, Oxford, United  
16    Kingdom

17    <sup>3</sup>Lydia Becker Institute of Immunology and Inflammation, Faculty of Biology, Medicine and Health,  
18    University of Manchester, Manchester, United Kingdom

19    <sup>4</sup>Centre for Drugs and Diagnostics, Department of Tropical Disease Biology, Liverpool School of  
20    Tropical Medicine, Pembroke Place,

21    <sup>5</sup>Department of Medical Parasitology and Infection Biology, Swiss Tropical and Public Health  
22    Institute, Socinstrasse 57, 4002 Basel, Switzerland.

23    <sup>6</sup>University of Basel, P.O. Box CH-4003, Basel, Switzerland.

24 <sup>7</sup>Henry Royce Institute, The University of Manchester, Oxford Road, Manchester, M13 9PL, United  
25 Kingdom

26 <sup>8</sup>Alzheimer's Research UK UCL Drug Discovery Institute, University College London, London,  
27 United Kingdom

28 <sup>9</sup>Centre for Neglected Tropical Diseases, Liverpool School of Tropical Medicine, Pembroke Place,  
29 Liverpool, L3 5QA, United Kingdom.

30 <sup>10</sup>Department of Pharmacology, University of Oxford, Oxford, United Kingdom

31

32

33 \* Corresponding authors: Email [d.sattelle@ucl.ac.uk](mailto:d.sattelle@ucl.ac.uk) (DBS), [kathryn.else@manchester.ac.uk](mailto:kathryn.else@manchester.ac.uk) (KJE),  
34 [angela.russell@chem.ox.ac.uk](mailto:angela.russell@chem.ox.ac.uk) (AJR)

35 <sup>†</sup>These authors contributed equally.

36

## 37 Abstract

38 Nine hundred million people are infected with the soil-transmitted helminths *Ascaris lumbricoides*  
 39 (roundworm), hookworm, and *Trichuris trichiura* (whipworm). However low single dose cure rates of  
 40 the benzimidazole drugs, the mainstay of preventative chemotherapy for whipworm, together with  
 41 parasite drug resistance, mean that current approaches may not be able to eliminate morbidity from  
 42 Trichuriasis. We are seeking to develop new anthelmintic drugs specifically with activity against  
 43 whipworm as a priority, and previously identified a hit series of dihydrobenzoxazepinone (DHB)  
 44 compounds that block motility of *ex vivo* *Trichuris muris*. Here we report a systematic investigation  
 45 of the structure-activity relationship of the anthelmintic activity of DHB compounds. We synthesised  
 46 47 analogues, which allowed us to define essential features of the molecules essential for anthelmintic  
 47 action, as well as broadening the chemotype by identification of dihydrobenzoquinolinones (DBQ)  
 48 with anthelmintic activity. We also investigated the activity of these compounds against other  
 49 parasitic nematodes, identifying DHB compounds with activity against *Brugia malayi* and  
 50 *Heligmosomoides polygyrus*. These results demonstrate the potential of DHB and DBQ compounds  
 51 for further development as broad-spectrum anthelmintics.

52

## 53 Introduction

54 900 million people are infected with soil-transmitted helminths causing a global burden of around two  
 55 million disability-adjusted life years [1,2]. Because of this, the World Health Organization has set a  
 56 goal to achieve and maintain elimination of soil-transmitted helminth morbidity by 2030 [3]. Huge  
 57 mass drug administration efforts are underway, distributing hundreds of millions of doses of  
 58 benzimidazole drugs (albendazole and mebendazole) to school-age children in affected areas annually  
 59 or biannually as preventative chemotherapy (PCT).

60 Benzimidazole drugs are partially effective against whipworm (*Trichuris trichiura*) when  
 61 administered as a course of treatment, reaching cure rates of around 43% [4]. However, for mass drug  
 62 administration, practicalities and scale mean that only one dose is given. In contrast to the *Ascaris*

63 *lumbricoides*, where a single dose of benzimidazole drugs cures around 90-95% of infected  
 64 individuals, the single dose cure rate for whipworm is low, around 30% [5,6]. The current mass drug  
 65 administration protocol may therefore not be able to break transmission and reduce the prevalence of  
 66 moderate to heavy whipworm infections to below 2% as required to eliminate morbidity [3]. Due to  
 67 the poor single dose efficacy of the benzimidazole drugs against whipworm, there have been  
 68 extensive efforts to identify more efficacious drug combinations [6]. Of these the most promising to  
 69 date is a combination of albendazole plus the N-type nicotinic acetylcholine receptor agonist oxantel  
 70 pamoate, which has a single dose cure rate reported to be between 31 and 83% [7–10]. A second  
 71 veterinary drug, moxidectin, also shows promise to be added to albendazole for improved control of  
 72 whipworm [7].

73 Of concern, however, is the possibility that drug resistance may become prevalent, derailing the push  
 74 towards control of whipworm. Currently there is only indirect evidence of this possibility. In a meta-  
 75 analysis, it has been shown that egg reduction rates and cure rates after albendazole treatment are  
 76 decreasing over time [11]. Polymorphisms in the beta-tubulin gene that are associated with  
 77 benzimidazole resistance are found in populations of human whipworm, and the frequency of these  
 78 polymorphisms increased after albendazole treatment [12,13]. The Starworms project will establish a  
 79 valuable system to monitor benzimidazole drug efficacy and the potential emergence of anthelmintic  
 80 resistance due to soil-transmitted helminth control programs [14]. Because of these two problems –  
 81 low efficacy of existing drugs against whipworm, and concerns about development of resistance to  
 82 these drugs – we and others have been pursuing a strategy of identifying new anti-whipworm  
 83 compounds, via a mixture of repurposing and *de novo* small molecule screening [15–22].

84 Beyond soil transmitted helminths (STH), lymphatic filariasis and schistosomiasis are two medically  
 85 important tissue helminthiasis prioritised for global or regional elimination via mass PCT, as outlined  
 86 in the WHO Roadmap 2030 implementation targets [23]. A related filarial nematodiasis,  
 87 onchocerciasis, is also targeted for regional elimination. Reliance on a few, or in the case of  
 88 onchocerciasis and schistosomiasis, a single chemotherapeutic agent (ivermectin and praziquantel,  
 89 respectively) used ‘en masse’ for PCT, is a vulnerability of current elimination strategies, considering

the potential for development of drug resistance. As with STH, annual or semi-annual mass drug administrations extending upward of 20 years are required to break transmission with current drugs due to incomplete adulticidal / selective larvicidal activity profiles of the implemented anti-filarial or schistosomicidal agents. Alternative strategies, for instance, development of a short-course curative treatment for filariasis, would be a step-change to reduce elimination time frames.

We previously described a hit series of five dihydrobenz[e][1,4]oxazepin-2(3*H*)-one (DHB) compounds with anthelmintic activity against *ex vivo* *T. muris* [18]. Here we report our progress in expanding this hit series and understanding the relationship between structure and anthelmintic activity. We also extend our investigations of the activity of the DHB compounds against *Brugia malayi*, a causative agent of lymphatic filariasis and *Heligmosomoides polygyrus bakeri*, a mouse parasite model of human hookworm.

101

## 102 **Materials and Methods**

### 103 **Ethics statement**

All experimental procedures involving *T. muris* were approved by the University of Manchester Animal Welfare and Ethical Review Board and performed within the guidelines of the Animals (Scientific Procedures) Act, 1986.

All experiments involving *Brugia malayi* were approved by the ethical committees of the University of Liverpool and Liverpool School of Tropical Medicine (LSTM) and conducted under Home Office Animals (Scientific Procedures) Act 1986 (UK) requirements and the ARRIVE guidelines.

The work on *Heligmosomoides polygyrus* was approved by the local veterinary agency, based on Swiss cantonal and national regulations (permission no. 2070).

## Chemical synthesis

Compounds were synthesised from commercially available starting materials, and fully characterised by Nuclear Magnetic Resonance Spectroscopy and Mass Spectrometry. Full experimental details and analytical data are provided in the Supporting Information.

## Isolation of *T. muris* adults

Male and female severe combined immunodeficient (SCID) mice were bred in house at the University of Manchester and used at age 8-12 weeks. Mice were maintained at a temperature of 20-22°C in a 12h light, 12h dark lighting schedule, in sterile, individually ventilated cages with food and water *ad lib*.

The parasite was maintained and the infectivity of the administered *T. muris* eggs was assessed as previously described [24,25]. For generation of adult *T. muris* worms 150 infective eggs were given per oral gavage in water to each SCID mouse. 35 days post infection mice were sacrificed via schedule one methods. At necropsy the caecae and colons were removed, opened longitudinally and washed with pre-warmed RPMI-1640 media supplemented with penicillin (500U/ml) and streptomycin (500µg/ml). Adult *T. muris* worms were gently removed using fine forceps under a dissecting microscope and maintained at 37°C in RPMI-1640 media supplemented with penicillin (500U/ml) and streptomycin (500µg/ml).

## *T. muris* adult motility assay

Single adult worms were placed in microplate wells containing 100 µL of RPMI-1640 medium, penicillin (500 U/mL), streptomycin (500 µg/mL) and 1 µl (1% v/v) dimethylsulfoxide (DMSO) or compound dissolved in DMSO. Assay plates were incubated at 37°C with 5% CO<sub>2</sub>. The INVAPP system was used to quantify worm motility [26]. Movies of the whole plate were recorded (20 frames, 100 ms interval) and motility determined by thresholding the variance of each pixel in the image over time [27]. Compounds were initially tested at 100 µM. Those showing activity were also tested at lower concentrations, typically 50 and 75 µM, and EC<sub>50</sub> estimates were measured for compounds of interest using the a log-logistic model and the R package *drc* [28].

## *B. malayi* parasite production

The life cycle of *B. malayi* was maintained in *Aedes aegypti* mosquitoes (Liverpool strain) and inbred Mongolian gerbils housed at the Biomedical Services Unit, University of Liverpool under specific pathogen-free conditions. Microfilariae were harvested from experimentally infected Mongolian gerbils via catheterization under anaesthesia and fed to mosquitoes in human blood at 20,000 mf / ml using artificial membranes heated to 37 °C. Mosquitoes were reared for 14 days with daily sugar-water feeding to allow development to larval stage (*BmL3*). At day 14, *BmL3* were collected from infected mosquitoes by stunning at 4 °C, crushing and concentrating using a Baermann's apparatus and RPMI-1640 media. Male IL-4R $\alpha^{-/-}$ IL-5 $^{-/-}$  BALB/c mice (gifted by Prof. Achim Hoerauf, University of Bonn, Germany) aged 6-8 weeks, weighing 18-24 g were infected intraperitoneally with 150 *BmL3* and left for 12 weeks to develop to patent adult stage as previously detailed [29].

## *B. malayi* microfilaria assay

*Brugia malayi* microfilariae (mf) were harvested from Mongolian gerbils via intraperitoneal lavage and purified using PD-10 columns (Amersham). Mf densities were then adjusted to 8,000 / well in complete medium consisting of RPMI-1640 supplemented with 1% penicillin-streptomycin, 1% amphotericin B and 10% FBS within 96 well plates.

33 test compounds (10 mM stock in 100% DMSO) were initially tested against mf. Compounds were diluted to 10  $\mu$ M in complete medium and added to the plated mf. Three replicates were used for each compound, and each plate included ivermectin (50  $\mu$ M) as a positive control and DMSO (0.5% v/v) as a negative control. Assay plates were incubated for 6 days at 37°C, 5% CO<sub>2</sub>. Mf were scored daily for motility as a proxy of nematode health, using a 5 point scoring system (4 = fully motile, 0 = no motility) as described previously [30]. Compounds found to reduce motility were progressed to a secondary screen, whereby the MTT assay was employed at day 6 to assess parasite viability quantitatively. For this, excess media was removed from wells and mf were incubated with 0.5 mg/ml MTT (3-(4,5-Dimethylthiazol-2-yl)-2,5-Diphenyltetrazolium Bromide (Merck) in PBS at 37°C for 90

min. After washing in PBS and centrifugation, mf pellets were incubated in 100% DMSO for 1 h at 37°C to solubilize the blue formazan product. Samples were read at OD 490 nm on a 96-well plate reader (Varioskan, Bio-Rad). Compounds exhibiting the greatest activity on parasite viability were progressed further for drug dose titration assays.

### *B. malayi* adult assay

Adult female *B. malayi* of 12-24 weeks of age were isolated from susceptible IL-4Rα<sup>-/-</sup>IL-5<sup>-/-</sup> immunodeficient mice, washed in PBS and added to lymphatic endothelial cell co-cultures (HMVECdy; LEC; Lonza) at a density of two parasites per well. Successful test compounds from the mf assay were diluted to 10 µM and added to the trans-wells in 6 ml endothelial basal media with supplements (EGM-2 MV; Lonza). Twelve replicates (n = 6 wells) were set up per group, with flubendazole (10 µM; Sigma) and DMSO (0.5% v/v) added as controls. Plates were incubated for 14 days at 37 °C, 5% CO<sub>2</sub> with daily motility scoring, as above. Individual parasites were taken for MTT analysis at day 14.

### *Heligmosomoides polygyrus*

*H. polygyrus* larvae (L3) were obtained by filtering the faeces of infected mice and cultivating the eggs on an agar plate for 8-10 days in the dark at 24°C. 30-40 L3 were placed in each well of a 96-well plate for each compound in the presence of 100 µl RPMI 1640 (Gibco, Waltham MA, USA) culture medium supplemented with 5% amphotericin B (250 µg/ml, Sigma-Aldrich, Buchs, Switzerland) and 1% penicillin 10,000 U/ml, and streptomycin 10 mg/ml solution (Sigma-Aldrich, Buchs, Switzerland) with the test drugs (100 µM concentration). Worms were kept at room temperature for 72 h and for evaluation 50-80 µl of hot water (≈80°C) was added to each well and the larvae that responded to this stimulus (the moving worms) were counted. The proportion of larval death was determined. Compounds were tested in duplicate at 100 µM. Control wells were included in each experiment, which included the highest amount of solvent (1% DMSO).



## Results

### Novel DHB Chemistry

We have recently reported the identification of five dihydrobenzoxazepinone (DHB) hit compounds as a new family of molecules active against *T. muris* adult motility [18]. Further, one of the compounds **OX02983** was also found to be efficacious at reducing the ability of eggs to establish infection *in vivo*. As we identified a limited number of active DHB family members in the first instance via a library screen, we aimed to investigate the DHB chemotype systematically with the goal of understanding their structure-activity relationships (SARs) and improving potency. **OX02983** was used as a starting point of our investigation.

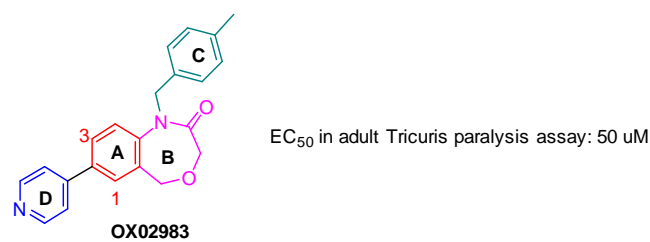

**Figure 1. Structure of OX02983 highlighting the four cycles labelled A-D**

The synthesis used to prepare **OX02983** was adapted to systematically alter all the different cycles **A-D**, as shown in Figure 1. The first step was a reductive amination of the requisite aminobromobenzoate with the desired amine to install cycles **A** and **C**. This was followed by a ring-closure step to generate cycle **B** and finally a cross-coupling reaction to add cycle **D** (Scheme 1).

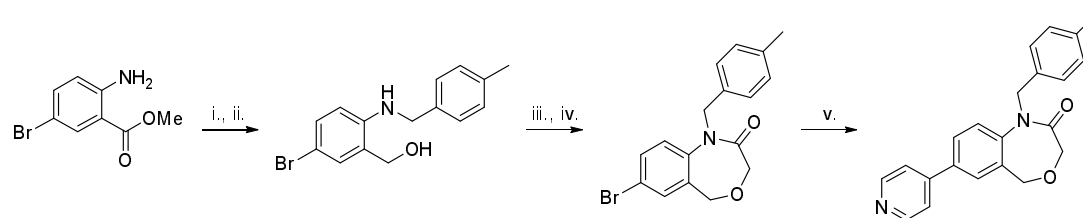

**Scheme 1. Representative scheme for synthesis of DHB compounds.** i. 4-methylbenzaldehyde (1.5 eq.), AcOH (0.5 eq.), NaBH(OAc)<sub>3</sub>, CH<sub>2</sub>Cl<sub>2</sub>, 0 °C to RT, 48 h; ii. LiAlH<sub>4</sub> (1 M in THF, 3.5 eq.); iii.

chloroacetyl chloride (2.0 eq.), NEt<sub>3</sub> (2.0 eq.), THF, 0 °C to rt, 16 h; iv. NaOH (10 N, aq), rt, 2 h; v. 4-pyridyl-B(OH)<sub>2</sub> (1.1 eq.), Pd(dppf)Cl<sub>2</sub> (5 mol%), K<sub>2</sub>CO<sub>3</sub> (3 eq.), 1,4-dioxane/H<sub>2</sub>O (4:1), 90 °C 18 h.

It was decided to conduct a systematic structure activity relationship (SAR) investigation and alter the four different cycles within the structure of **OX02983** to understand their importance in the activity against *T. muris* with a view to improving efficacy. As the synthesis is linear, it was logical to investigate from **A** to **D**. We therefore started with core **B**, to ascertain the importance of regiochemistry and relative orientation of the substituents (Table 1). All the prepared compounds were screened using an automated adult *T. muris* motility assay [26] at 100 µM. Active compounds were also tested at lower concentrations and/or an EC<sub>50</sub> value determined to assess their relative activity.

Using the appropriate starting materials (see S1 File for details of the syntheses), the different structural analogues **OX03701**, **OX03707** (where the 4-pyridyl ring is in position 8 and 6 of the bicyclic core respectively, see Figure 1) and **OX03704** (the reverse amide equivalent of **OX02983**) were prepared using a similar synthesis to **OX02983** (Table 1). Interestingly, none of the structural analogues exhibited any activity in our *ex vivo* adult *T. muris* motility assay, revealing that the regiochemistry within **OX02983** is important for its activity. The next step was to investigate cycle **C**; a small set of amines was used in the reductive amination step to prepare analogues **OX04118**, **OX04120**, **OX02993**, **OX03825**, **OX03144** bearing methyl, cyclopropyl, cyclohexyl, benzyl and *p*-trifluoromethylbenzyl groups respectively. From those, only the cyclohexyl substituted derivative **OX02993** and the *p*-trifluoromethylbenzyl substituted derivative **OX03144** showed activity in the motility assay, with EC<sub>50</sub> values of 52 µM and 26 µM respectively. The next step was to vary cycle **D**, while keeping cycles **A-C** constant to allow a comparison with **OX02983**. Suzuki reactions were therefore carried out on the 7-bromo precursor with an array of boronic acids and esters. The regioisomers of the pyridyl ring (**D**) were tolerated with meta and para giving the best activity. Analogues where the pyridyl ring was replaced with an aryl substituent were all inactive, be they unsubstituted (**OX03596**), substituted with an electron withdrawing group (4-F, **OX03600**), or an electron donating group (4-Me, **OX03601**) (Table 1). Different heterocycles were also trialled in place

of the pyridine; a similar level of activity was obtained with the isosteric thiazole (**OX04122**, EC<sub>50</sub> of 45 µM) and the methylimidazole (**OX04123**, EC<sub>50</sub> of 68 µM) analogues. Substituting with a pyrimidine (**OX03705**) led to a loss of activity, leading us to hypothesize that the basicity of the substituent may be of importance to the activity. Following this, we prepared phenylamine and benzyl amine-substituted analogues **OX03824** and **OX03710**, but neither exhibited activity against *T. muris*, suggesting incorporating a linker between cycles **A** and **D** was not tolerated. We then turned our interest to substituted pyridyl, and although the methoxy substituted pyridyl (**OX04116**) was not active, the amino pyridyl **OX04117** displayed modestly improved activity than **OX02983** (EC<sub>50</sub> 26 µM), which may be related to its moderately higher basicity.

In an effort to improve the efficacy further, we looked at more drastic modification to core **B**, by contracting the ring by removing the oxygen atom. Forge (Cresset) was used to overlay **OX02983** and its six-membered ring analogue **OX3699**; a good fit was obtained (~79% similarity) suggesting dihydrobenzoquinolinones (DBQ) as possible candidates for further improvement (Figure 2).

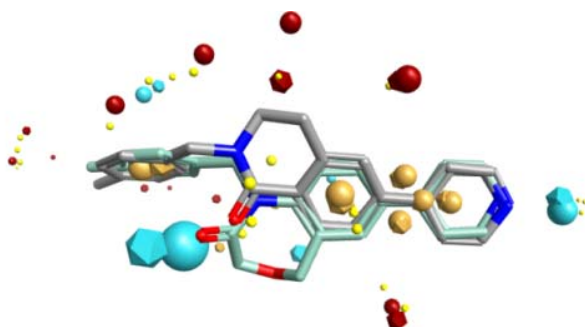

**Figure 2.** Overlay of **OX02983** (light blue) and **OX3699** (grey); blue spheres represent negative electrostatic field, red spheres represent positive electrostatic field, brown spheres represent hydrophobicity and small yellow sphere represent the van der Waals force.

DBQs have been investigated quite extensively in medicinal chemistry; examples have been reported as antiviral agents through inhibition of HIV replication [31,32]. Other analogues were found to

inhibit WDR5 protein-protein interactions, leading to inhibition of cancer cell proliferation [33–35].<sup>3-</sup>

<sup>5</sup>

It was decided to prepare a small number of compounds only using those substituents and comparable regiochemistry that gave the most potent analogues so far.

The synthesis started with substitution at *N*2 of 6-bromo-3,4-dihydroisoquinolinone with 4-methylbenzyl bromide, followed by a Suzuki coupling reaction with the requisite boronic acid to afford the desired ring contracted **OX02983** mimic (Scheme 2).

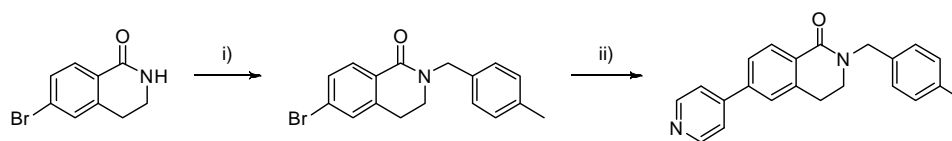

**Scheme 2.** Synthesis of **OX3699**: Reagents and conditions: i) 4-methylbenzyl bromide (2 eq.), NaH (1.5 eq.), DMF, rt, 16 h (96 %); iii) 4 v. 4-pyridyl-B(OH)<sub>2</sub> (1.1 eq.), Pd(dppf)Cl<sub>2</sub> (5 mol%), K<sub>2</sub>CO<sub>3</sub> (3 eq.), 1,4-dioxane/H<sub>2</sub>O (4:1), 90 °C 18 h.

The DBQ bearing the 3-and 4-pyridyl substituents (**OX03699** and **OX04236**) were active in the motility assay and led to similar EC<sub>50</sub>s to the best results from the DHB series (with EC<sub>50</sub> values of 21 μM and 46 μM respectively). Unfortunately, as soon as we moved away from the simple pyridyl substituent, all activity in the motility assay was lost again. The 2-amino pyrid-5-yl, the best example of ring **D** in the DHB series, was surprisingly inactive (**OX04238** EC<sub>50</sub> >100 μM vs. **OX04117** EC<sub>50</sub> 26 μM). Similarly, the methyl imidazole and the thiazole-substituted analogues (**OX04237** and **OX4739** respectively), also exhibited no activity in the motility assay, in contrast to their DHB counterparts suggesting that SARs did not correlate between the DHB and DBQ series. As the best results from the DQB and the DHB series were largely similar, we felt that this alternative core was not going to enhance substantially the potency of the compounds.

Collectively, these data have improved our understanding or provided insights into the SARs of the DHB/DQB family of compounds. The structure of cycles **A** and **B** in **OX02983** were found to be critical to activity; variations of the toluyl group for ring **C** generally also led to inactive compounds. Some variations of cycle **D** were tolerated, and there appeared to be a preference for a basic site

281 within the substituent. However, although we were able to alter the structure resulting in loss of  
 282 activity, we were unable to improve, only retain, activity.  
 283 Apart from the representative compounds presented in Table 1, further similar analogues and all  
 284 synthetic precursors were prepared and tested (S2 File). Together it gave us a library of 47 compounds  
 285 that could then be used against different parasites to understand whether these compound series  
 286 showed broad-spectrum anthelmintic activity.  
 287  
 288

| Compound | Structure                                                                           | EC <sub>50</sub> (μM) in <i>T. muris</i> adult motility assay |
|----------|-------------------------------------------------------------------------------------|---------------------------------------------------------------|
| OX02983  | 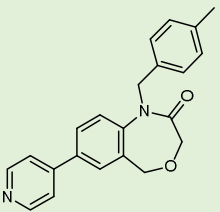   | 50                                                            |
| OX03701  |   | no activity                                                   |
| OX03707  |  | ≥ 100                                                         |
| OX03704  |  | ≥75                                                           |
| OX03825  |  | ≥75                                                           |

|         |                                                                                     |             |
|---------|-------------------------------------------------------------------------------------|-------------|
| OX03144 | 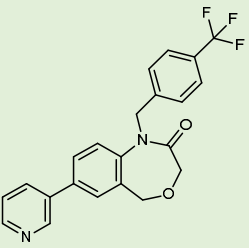   | 26          |
| OX04118 |    | ≥75         |
| OX04120 |    | ≥75         |
| OX02993 |    | 52          |
| OX04115 |   | 72          |
| OX03153 |  | 57          |
| OX03596 |  | no activity |
| OX03600 |  | no activity |

|         |                                                                                     |             |
|---------|-------------------------------------------------------------------------------------|-------------|
| OX03601 | 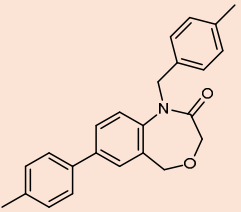   | no activity |
| OX03705 |    | no activity |
| OX04122 |    | 45          |
| OX04123 |   | 68          |
| OX03710 |  | no activity |
| OX03824 |  | no activity |
| OX04116 |  | no activity |
| OX04117 |  | 26          |

|         |                                                                                    |             |
|---------|------------------------------------------------------------------------------------|-------------|
| OX03146 | 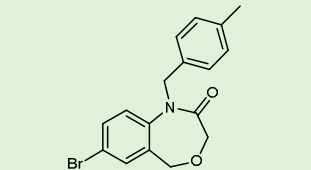  | 35          |
| OX03699 |   | 21          |
| OX04236 |   | 42          |
| OX04238 |   | no activity |
| OX04237 |   | no activity |
| OX04239 |  | no activity |

289

290 **Table 1. Structures and EC<sub>50</sub> of representative DHB compounds in the *T. muris* adult motility**  
 291 **assay.** All compounds investigated in this study are described in the S2 File. No activity means no  
 292 clear reduction in motility when tested at 100 µM. Where an EC<sub>50</sub> estimate is shown, it was calculated  
 293 using a log-logistic model (n = 4) using the R package drc [28].

294

## 295 DHB compounds are active in models of a range of helminth infections

296 Whipworm is only one of many widely prevalent human helminth infections, and there are continuing  
 297 efforts to improve drug treatments for these diseases. There have been recent successes, such as the  
 298 approval of the veterinary medicine moxidectin for onchocerciasis [36], and the establishment of the  
 299 triple therapy albendazole, diethylcarbamazine citrate plus ivermectin as a macrofilaricidal treatment  
 300 for lymphatic filariasis suitable for mass drug administration [37,38]. However, sub-optimal efficacy,



problematic contraindications, and concerns that mass drug administration could lead to the spread of drug resistance, mean that repurposing of veterinary anthelmintics, improving drug combinations, and the development of new anthelmintics remain priorities [39–41].

Development of a new anthelmintic is a long and expensive process, and funding for neglected tropical diseases is limited. Furthermore, multiple parasitic nematodes, for example the soil transmitted nematodes, *Ascaris*, *Trichuris* and the human hookworms, and the vector transmitted filarial nematodes, are often endemic in the same regions. It would, therefore, be helpful if a new drug would have activity against several target species and which worked across the phylum Nematoda. We therefore wanted to investigate whether the DHB series of compounds had a range of activities beyond *Trichuris*.

# Activity against *B. malayi*

*B. malayi* is one of the tissue dwelling nematode parasites responsible for human lymphatic filariasis [42]. We first examined single dose efficacy of 33 DHB compounds at 10  $\mu$ M against the *B. malayi* mf larval stage, with motility scored every 24 hours. The results after six days are shown in Fig 3A. Ivermectin was used as a positive control in the mf assay. OX02983 showed the most promise in this assay, reducing average motility to a score of 1. From this primary screen, 15 compounds that were determined to significantly impact *B. malayi* mf motility, plus an additional 5 with no discernible effect, were retested in a secondary screen (Fig 3B). These results confirmed the significant reduction in motility caused by 11 compounds, and confirmed the paralytic effect of OX02983. After six days drug exposure, mf were also tested for metabolic activity, a measure of parasite viability, using the MTT assay (Fig 3C). OX02983 and OX03153, in particular, showed activity in this assay, significantly reducing *B. malayi* mf MTT reductase activity on average by 53.4% and 81.9%, respectively (1-way ANOVA with Holm-Sidak's multiple comparison tests,  $P < 0.01$  and  $P < 0.0001$ ). To determine the dose-dependent efficacy of OX02983 and OX03153, they were tested in a concentration response 6-day experiment (dose range 0.016–50  $\mu$ M) using MTT reductase activity as a

quantitative viability readout (Fig 3D,E). From this an EC<sub>50</sub> concentration of 5.47 µM was determined for OX02983 and 26.67µM for OX03153.

Due to their efficacy against *B. malayi* mf, OX02983 and OX03153 were advanced for *in vitro* activity against adult *B. malayi*, utilising a novel, long-term adult worm lymphatic endothelial cell bilayer co-culture system. Adult female *B. malayi* exposed to vehicle control retained full survival and motility in culture over 14 days whereas the positive control, flubendazole (10µM) mediated complete paralytic activity by day 14 (Kruskal Wallis with Dunn's multiple comparisons tests, P<0.001) and significantly reduced metabolic activity by an average of 71.9% (1-way ANOVA with Holm-Sidak's multiple comparison tests, P<0.001) (Fig 3F-G). OX02983 (10µM) also mediated significant anti-filarial activities against adult *B. malayi* by day 14. Motility was completely hindered in 4/6 adult parasites by OX02983 (Kruskal Wallis with Dunn's multiple comparisons tests, P<0.001), whilst OX03153 mediated a 50% partial reduction in adult motility. OX02983 also significantly impacted on adult female *B. malayi* metabolic activity, on average by 40.8% (1-way ANOVA with Holm-Sidak's multiple comparison tests, P<0.05). Taken together, these results are encouraging because they show that compounds that are active against *T. muris* (a clade I nematode according to the phylogeny of Blaxter) are also active against evolutionarily-distant nematodes, as *B. malayi* is a clade III nematode [43].

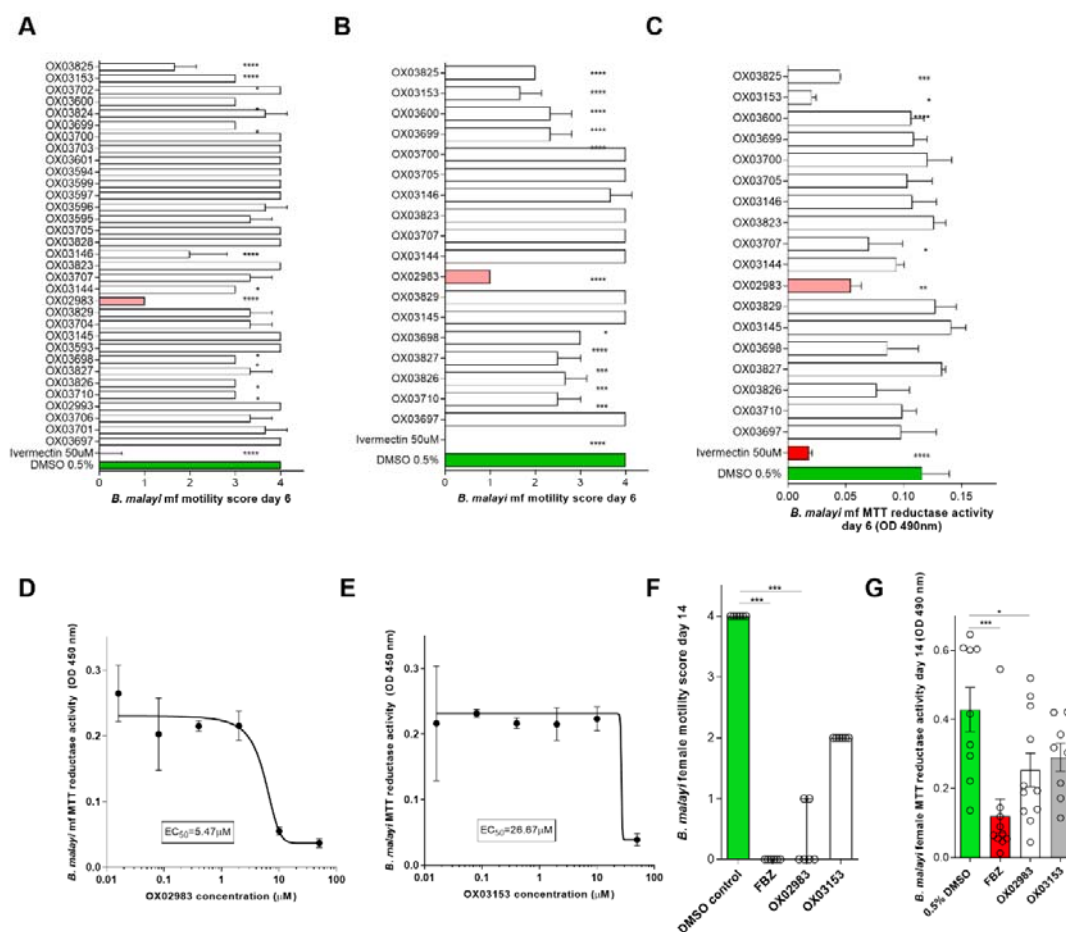

**Figure 3. Activity of 33 DHB compounds against *B. malayi* microfilariae and adults.** (A) Primary screen – assessment of *B. malayi* mf motility (5 point scoring system) after six days continuous exposure to 35 test compound screened at 10  $\mu$ M in triplicate. Ivermectin (50  $\mu$ M) was the positive control. (B) Confirmatory mf motility and (C) metabolic activity screening of 15 active compounds identified in (A) and five inactive compounds (10 $\mu$ M in triplicate). (D, E) 50% inhibitory concentration ( $EC_{50}$ ) assays of active compounds OX02983 and OX03153 on *B. malayi* microfilarial metabolic activity after 6-day continuous exposure. Metabolic activity (C-E) was assessed by colorimetric MTT assay, data is optical density of mf extracts measured at 490nm. (F) Effects on adult female *B. malayi* motility and (G) metabolic activity following 14 day continuous exposure to OX02983 or OX03153 (10 $\mu$ M). Flubendazole (10 $\mu$ M) was used as a positive control in the assay. Data plotted is mean  $\pm$  SD of 3 replicates (A-E) median and range of 6 replicates (F) and mean  $\pm$

SEM of 9-11 replicates (G). Significant differences were determined by 1-way ANOVA with Holm-Sidak multiple comparisons test (A-C and G) or Kruskal-Wallis with Dunn's multiple comparisons test (F). Significance is indicated \*\*\*\*P<0.0001, \*\*\*P<0.001, \*\*P<0.01 and \*P<0.05.

#### Activity against *H. polygyrus*

*H. polygyrus bakeri* is an intestinal nematode parasite of laboratory mice [44]. It is a strongylid nematode, related to human hookworm species. 31 DHB compounds were tested at 100 µM against *ex vivo* *H. polygyrus* L3 stage worms (n = 2). The results are shown in Figure 4. The cut-off used to determine hits in this assay is 50% larval death [17]. Two compounds, OX03594 and OX03599, exceeded this level of larval death and were therefore considered active. They did not however reach the threshold for good activity (75%). Given the modest activity of these compounds against *H. polygyrus* we have not further pursued this direction at this point. Activity of DHB compounds against nematodes in three of the five clades of the phylum Nematoda, according to the phylogeny of Blaxter, supports the potential for development of a pan-nematode control agent from this compound series [43].

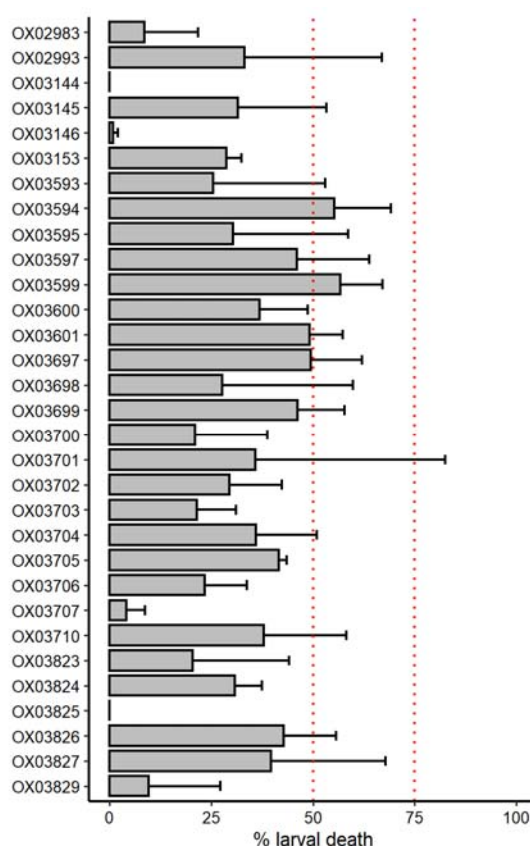

**Figure 4. Measurement of the activity of 31 DHB compounds against *H. polygyrus* L3 stage worms.** Larval death is measured as the proportion of worms that respond to stimulus. Compounds were tested in duplicate at 100  $\mu$ M. Dashed lines indicates the cut-off (50%) used to determine hits in this assay and the cut-off for good activity (75%) [17]: <50%, not active, 50-75% moderate activity, >75% good and >90% excellent activity.

## Discussion

### Investigation of the DHB structure-activity relationship

We previously identified a small hit series of five DHB compounds with activity against *T. muris* adult motility (REF). In medicinal chemistry, it is important to understand how variations in the structure of the compound affect activity, as this allows us to discover the critical aspects of the compound for target binding, with the overall aim of increasing potency as well as improving physicochemical properties. We therefore embarked upon a systematic, structure-activity relationship investigation, taking advantage of the convenient synthesis of the DHBs, which allowed us to systematically alter the four cyclic components of this class of compounds. A total of 47 variant compounds were synthesised in this work.

This work has enabled us to define certain essential features of the anti-whipworm DHB compounds. The 4-pyridyl ring (cycle D in Fig 1) must be in the 2 position, unlike the analogues **OX03701** and **OX03707**. The amide moiety of the oxazepinone ring must be as in **OX02983**, and not as in **OX03704**. The oxazepinone nitrogen can be substituted with methylbenzyl, cyclohexyl and *p*-trifluoromethylbenzyl (**OX02983**, **OX02993**, and **OX03144**), but not methyl, cyclopropyl, or benzyl groups. We also investigated in detail the replacement of cycle D. We found that removal of the oxygen from the DHB core was also consistent with similar activity to **OX02983** – the dihydrobenzoquinolinone compounds **OX03699** and **OX04236** had EC<sub>50</sub> values of 21 and 42 µM respectively.

### Targeting multiple helminth species with DHB family members

Despite being unable to improve efficacy against *Trichuris* substantially through structural modifications, we were able to demonstrate activity of our compounds against other helminth parasites. In drug discovery for NTDs, pan-anthelmintic activity is desirable given that polyparasitism in the target population is the norm. Thus, being able to target multiple species of helminths with a single drug administered via mass drug administration programmes is of significant benefit. Of particular note was the commonality in DHB compounds active against *T. muris* that were also active

against the tissue dwelling nematode parasite *B. malayi*. The ability of the DHB compounds to act against different clades within the nematode phylum is not unprecedented, indeed the co-administration of albendazole with ivermectin is currently advocated for control of *Trichuris*, and the same drug combination (in some situations supplemented with diethylcarbamazine) is widely used against lymphatic filariasis [38]. Indeed, the large-scale efforts to treat lymphatic filariasis have indirectly enhanced the number of people being treated for soil transmitted helminths [45]. Similarly, the alternative drug combination of albendazole and moxidectin is also being explored for the treatment of Trichuriasis given that moxidectin is an approved treatment for onchocerciasis [46].

## Conclusions

In this study we have investigated the structure-activity relationship of the DHB compounds, defined essential features for anthelmintic action, and broadened the active series by the discovery of dihydrobenzoquinolinone compounds with activity against *T. muris* adult motility. We have also demonstrated that DHB and related compounds have activity against other parasitic nematodes: *B. malayi* and *H. polygyrus*. What we have not achieved however, is the substantive improvement in potency from the 20-50  $\mu$ M range that would be desirable to progress this series with confidence to *in vivo* testing. Open science, where information is disclosed more freely than in traditional models, is proposed to accelerate and make more cost efficient drug discovery, especially in the context of neglected diseases [47,48]. We have therefore decided to report our progress at this point. We note that we do not yet know the target of the DHB/DBQ compounds in helminths. Identifying this target may facilitate the boost in activity we are striving for.

## Acknowledgments

JDT, MJT and AEM were supported by a National Centre for Replacement, Refinement and Reduction of Animals in Research Studentship (NC3R Studentship NC/M00175X/1) and a Bill and Melinda Gates Foundation award to the Liverpool School of Tropical Medicine (BMGF OPP1054324).

433 FAP and DBS are supported by Medical Research Council ([www.mrc.ac.uk](http://www.mrc.ac.uk)) grant MR/N024842/1.

434

## 435 References

- 436 1. GBD 2017 Disease and Injury Incidence and Prevalence Collaborators. Global,  
437 regional, and national incidence, prevalence, and years lived with disability for 354  
438 diseases and injuries for 195 countries and territories, 1990–2017: a systematic analysis  
439 for the Global Burden of Disease Study 2017. *Lancet*. 2018;392: 1789–1858.  
440 doi:10.1016/S0140-6736(18)32279-7
- 441 2. Kyu HH, Abate D, Abate KH, Abay SM, Abbafati C, Abbasi N, et al. Global, regional,  
442 and national disability-adjusted life-years (DALYs) for 359 diseases and injuries and  
443 healthy life expectancy (HALE) for 195 countries and territories, 1990–2017: a  
444 systematic analysis for the Global Burden of Disease Study 2017. *The Lancet*.  
445 2018;392: 1859–1922. doi:10.1016/S0140-6736(18)32335-3
- 446 3. World Health Organization. 2030 targets for soil-transmitted helminthiases control  
447 programmes. 2020 [cited 21 Apr 2020]. Available:  
448 [http://www.who.int/intestinal\\_worms/resources/9789240000315/en/](http://www.who.int/intestinal_worms/resources/9789240000315/en/)
- 449 4. Palmeirim MS, Ame SM, Ali SM, Hattendorf J, Keiser J. Efficacy and Safety of a  
450 Single Dose versus a Multiple Dose Regimen of Mebendazole against Hookworm  
451 Infections in Children: A Randomised, Double-blind Trial. *EClinicalMedicine*. 2018;1:  
452 7–13. doi:10.1016/j.eclinm.2018.06.004
- 453 5. Keiser J, Utzinger J. Efficacy of current drugs against soil-transmitted helminth  
454 infections: Systematic review and meta-analysis. *JAMA*. 2008;299: 1937–1948.  
455 doi:10.1001/jama.299.16.1937
- 456 6. Moser W, Schindler C, Keiser J. Drug Combinations Against Soil-Transmitted  
457 Helminth Infections. *Adv Parasitol*. 2019;103: 91–115. doi:10.1016/bs.apar.2018.08.002
- 458 7. Barda B, Ame SM, Ali SM, Albonico M, Puchkov M, Huwyler J, et al. Efficacy and  
459 tolerability of moxidectin alone and in co-administration with albendazole and  
460 tribendimidine versus albendazole plus oxantel pamoate against *Trichuris trichiura*  
461 infections: a randomised, non-inferiority, single-blind trial. *Lancet Infect Dis*. 2018;18:  
462 864–873. doi:10.1016/S1473-3099(18)30233-0
- 463 8. Speich B, Ame SM, Ali SM, Alles R, Huwyler J, Hattendorf J, et al. Oxantel Pamoate–  
464 Albendazole for *Trichuris trichiura* Infection. *New England Journal of Medicine*.  
465 2014;370: 610–620. doi:10.1056/NEJMoa1301956
- 466 9. Speich B, Ali SM, Ame SM, Bogoch II, Alles R, Huwyler J, et al. Efficacy and safety of  
467 albendazole plus ivermectin, albendazole plus mebendazole, albendazole plus oxantel  
468 pamoate, and mebendazole alone against *Trichuris trichiura* and concomitant soil-  
469 transmitted helminth infections: a four-arm, randomised controlled trial. *The Lancet*  
470 *Infectious Diseases*. 2015;15: 277–284. doi:10.1016/S1473-3099(14)71050-3



- 471 10. Speich B, Moser W, Ali SM, Ame SM, Albonico M, Hattendorf J, et al. Efficacy and  
472 reinfection with soil-transmitted helminths 18-weeks post-treatment with albendazole-  
473 ivermectin, albendazole-mebendazole, albendazole-oxantel pamoate and mebendazole.  
474 *Parasit Vectors*. 2016;9: 123. doi:10.1186/s13071-016-1406-8
- 475 11. Moser W, Schindler C, Keiser J. Efficacy of recommended drugs against soil  
476 transmitted helminths: systematic review and network meta-analysis. *BMJ*. 2017;358:  
477 j4307. doi:10.1136/bmj.j4307
- 478 12. Diawara A, Drake LJ, Suswillo RR, Kihara J, Bundy DAP, Scott ME, et al. Assays to  
479 Detect  $\beta$ -Tubulin Codon 200 Polymorphism in *Trichuris trichiura* and *Ascaris*  
480 *lumbricoides*. *PLoS Negl Trop Dis*. 2009;3: e397. doi:10.1371/journal.pntd.0000397
- 481 13. Diawara A, Halpenny CM, Churcher TS, Mwandawiro C, Kihara J, Kaplan RM, et al.  
482 Association between Response to Albendazole Treatment and  $\beta$ -Tubulin Genotype  
483 Frequencies in Soil-transmitted Helminths. *PLoS Negl Trop Dis*. 2013;7: e2247.  
484 doi:10.1371/journal.pntd.0002247
- 485 14. Vlamincck J, Cools P, Albonico M, Ame S, Chanthapaseuth T, Viengxay V, et al.  
486 Piloting a surveillance system to monitor the global patterns of drug efficacy and the  
487 emergence of anthelmintic resistance in soil-transmitted helminth control programs: a  
488 Starworms study protocol. *Gates Open Res*. 2020;4: 28.  
489 doi:10.12688/gatesopenres.13115.1
- 490 15. Elfawal MA, Savinov SN, Aroian RV. Drug Screening for Discovery of Broad-  
491 spectrum Agents for Soil-transmitted Nematodes. *Sci Rep*. 2019;9: 12347.  
492 doi:10.1038/s41598-019-48720-1
- 493 16. Hurst RJ, Hopwood T, Gallagher AL, Partridge FA, Burgis T, Sattelle DB, et al. An  
494 antagonist of the retinoid X receptor reduces the viability of *Trichuris muris* in vitro.  
495 *BMC Infectious Diseases*. 2014;14: 520. doi:10.1186/1471-2334-14-520
- 496 17. Keiser J, Panic G, Adelfio R, Cowan N, Vargas M, Scandale I. Evaluation of an FDA  
497 approved library against laboratory models of human intestinal nematode infections.  
498 *Parasit Vectors*. 2016;9: 376. doi:10.1186/s13071-016-1616-0
- 499 18. Partridge FA, Murphy EA, Willis NJ, Bataille CJR, Forman R, Heyer-Chauhan N, et al.  
500 Dihydrobenz[e][1,4]oxazepin-2(3H)-ones, a new anthelmintic chemotype immobilising  
501 whipworm and reducing infectivity *in vivo*. *PLoS Negl Trop Dis*. 2017;11: e0005359.  
502 doi:10.1371/journal.pntd.0005359
- 503 19. Partridge FA, Forman R, Willis NJ, Bataille CJR, Murphy EA, Brown AE, et al. 2,4-  
504 Diaminothieno[3,2-*d*]pyrimidines, a new class of anthelmintic with activity against  
505 adult and egg stages of whipworm. *PLoS Negl Trop Dis*. 2018;12: e0006487.  
506 doi:10.1371/journal.pntd.0006487
- 507 20. Preston S, Jiao Y, Baell JB, Keiser J, Crawford S, Koehler AV, et al. Screening of the  
508 “Open Scaffolds” collection from Compounds Australia identifies a new chemical entity  
509 with anthelmintic activities against different developmental stages of the barber’s pole  
510 worm and other parasitic nematodes. *Int J Parasitol Drugs Drug Resist*. 2017;7: 286–  
511 294. doi:10.1016/j.ijpddr.2017.05.004

- 512 21. Tyagi R, Maddirala AR, Elfawal M, Fischer C, Bulman CA, Rosa BA, et al. Small  
513 Molecule Inhibitors of Metabolic Enzymes Repurposed as a New Class of  
514 Anthelmintics. *ACS Infect Dis.* 2018;4: 1130–1145. doi:10.1021/acsinfecdis.8b00090
- 515 22. Weeks JC, Roberts WM, Leasure C, Suzuki BM, Robinson KJ, Currey H, et al.  
516 Sertraline, Paroxetine, and Chlorpromazine Are Rapidly Acting Anthelmintic Drugs  
517 Capable of Clinical Repurposing. *Sci Rep.* 2018;8: 975. doi:10.1038/s41598-017-  
518 18457-w
- 519 23. World Health Organization. Ending the neglect to attain the Sustainable Development  
520 Goals: A road map for neglected tropical diseases 2021–2030. World Health  
521 Organization; 2020. Available: [http://www.who.int/neglected\\_diseases/resources/who-ucn-ntd-2020.01/en/](http://www.who.int/neglected_diseases/resources/who-ucn-ntd-2020.01/en/)  
522
- 523 24. Sahputra R, Ruckerl D, Couper KN, Muller W, Else KJ. The Essential Role Played by B  
524 Cells in Supporting Protective Immunity Against *Trichuris muris* Infection Is by  
525 Controlling the Th1/Th2 Balance in the Mesenteric Lymph Nodes and Depends on Host  
526 Genetic Background. *Front Immunol.* 2019;10: 2842. doi:10.3389/fimmu.2019.02842
- 527 25. Wakelin D. Acquired immunity to *Trichuris muris* in the albino laboratory mouse.  
528 *Parasitology.* 1967;57: 515–524. doi:10.1017/s0031182000072395
- 529 26. Partridge FA, Brown AE, Buckingham SD, Willis NJ, Wynne GM, Forman R, et al. An  
530 automated high-throughput system for phenotypic screening of chemical libraries on *C.*  
531 *elegans* and parasitic nematodes. *International Journal for Parasitology: Drugs and Drug*  
532 *Resistance.* 2018;8: 8–21. doi:10.1016/j.ijpddr.2017.11.004
- 533 27. Buckingham SD, Partridge FA, Sattelle DB. Automated, high-throughput, motility  
534 analysis in *Caenorhabditis elegans* and parasitic nematodes: Applications in the search  
535 for new anthelmintics. *International Journal for Parasitology: Drugs and Drug*  
536 *Resistance.* 2014;4: 226–232. doi:10.1016/j.ijpddr.2014.10.004
- 537 28. Ritz C, Baty F, Streibig JC, Gerhard D. Dose-Response Analysis Using R. *PLOS ONE.*  
538 2015;10: e0146021. doi:10.1371/journal.pone.0146021
- 539 29. Pionnier N, Sjöberg H, Furlong-Silva J, Marriott A, Halliday A, Archer J, et al.  
540 Eosinophil-Mediated Immune Control of Adult Filarial Nematode Infection Can  
541 Proceed in the Absence of IL-4 Receptor Signaling. *The Journal of Immunology.*  
542 2020;205: 731–740. doi:10.4049/jimmunol.1901244
- 543 30. Turner JD, Pionnier N, Furlong-Silva J, Sjöberg H, Cross S, Halliday A, et al.  
544 Interleukin-4 activated macrophages mediate immunity to filarial helminth infection by  
545 sustaining CCR3-dependent eosinophilia. *PLOS Pathogens.* 2018;14: e1006949.  
546 doi:10.1371/journal.ppat.1006949
- 547 31. Johns BA, Velthuisen EJ, Weatherhead JG. Tetrahydroisoquinoline derivatives.  
548 WO2017093938A1, 2017. Available:  
549 <https://patents.google.com/patent/WO2017093938A1/fi>
- 550 32. Zhao XZ, Metifiot M, Smith SJ, Maddali K, Marchand C, Hughes SH, et al. 6,7-  
551 Dihydroxyisoindolin-1-one and 7,8-Dihydroxy-3,4-Dihydroisoquinolin- 1(2H)-one

- 552 Based HIV-1 Integrase Inhibitors. *Curr Top Med Chem.* 2016;16: 435–440.  
553 doi:10.2174/1568026615666150813150058
- 554 33. Shen J, Xiong B, Zhao Y, Li J, Geng M, Ma L, et al. 1,2,3,4-Tetrahydroisoquinolin-  
555 1(H)-one and 1(2H)-phthalazinone derivatives as histone deacetylase inhibitors and  
556 their preparation, pharmaceutical compositions and use in the treatment of cancer.  
557 CN107879975A, 2018.
- 558 34. Lee T, Alvarado JR, Tian J, Meyers KM, Han C, Mills JJ, et al. Wdr5 inhibitors and  
559 modulators. WO2020086857A1, 2020.
- 560 35. Tian J, Teuscher KB, Aho ER, Alvarado JR, Mills JJ, Meyers KM, et al. Discovery and  
561 Structure-Based Optimization of Potent and Selective WD Repeat Domain 5 (WDR5)  
562 Inhibitors Containing a Dihydroisoquinolinone Bicyclic Core. *J Med Chem.* 2020;63:  
563 656–675. doi:10.1021/acs.jmedchem.9b01608
- 564 36. Opoku NO, Bakajika DK, Kanza EM, Howard H, Mambandu GL, Nyathirombo A, et  
565 al. Single dose moxidectin versus ivermectin for *Onchocerca volvulus* infection in  
566 Ghana, Liberia, and the Democratic Republic of the Congo: a randomised, controlled,  
567 double-blind phase 3 trial. *Lancet.* 2018;392: 1207–1216. doi:10.1016/S0140-  
568 6736(17)32844-1
- 569 37. King CL, Suamani J, Sanuku N, Cheng Y-C, Satofan S, Mancuso B, et al. A Trial of a  
570 Triple-Drug Treatment for Lymphatic Filariasis. *New England Journal of Medicine.*  
571 2018 [cited 26 Mar 2020]. doi:10.1056/NEJMoa1706854
- 572 38. World Health Organization. Guideline: Alternative mass drug administration regimens  
573 to eliminate lymphatic filariasis. 2017. Available:  
574 [http://whqlibdoc.who.int/publications/2011/9789241501811\\_eng.pdf](http://whqlibdoc.who.int/publications/2011/9789241501811_eng.pdf)
- 575 39. Kuesel AC. Research for new drugs for elimination of onchocerciasis in Africa. *Int J*  
576 *Parasitol Drugs Drug Resist.* 2016;6: 272–286. doi:10.1016/j.ijpddr.2016.04.002
- 577 40. Vercruysse J, Albonico M, Behnke JM, Kotze AC, Prichard RK, McCarthy JS, et al. Is  
578 anthelmintic resistance a concern for the control of human soil-transmitted helminths?  
579 *International Journal for Parasitology: Drugs and Drug Resistance.* 2011;1: 14–27.  
580 doi:10.1016/j.ijpddr.2011.09.002
- 581 41. Wang W, Wang L, Liang Y-S. Susceptibility or resistance of praziquantel in human  
582 schistosomiasis: a review. *Parasitol Res.* 2012;111: 1871–1877. doi:10.1007/s00436-  
583 012-3151-z
- 584 42. Taylor MJ, Hoerauf A, Bockarie M. Lymphatic filariasis and onchocerciasis. *The*  
585 *Lancet.* 2010;376: 1175–1185. doi:10.1016/S0140-6736(10)60586-7
- 586 43. Blaxter ML, Ley PD, Garey JR, Liu LX, Scheldeman P, Vierstraete A, et al. A  
587 molecular evolutionary framework for the phylum Nematoda. *Nature.* 1998;392: 71–75.  
588 doi:10.1038/32160
- 589 44. Behnke JM, Menge DM, Noyes H. *Heligmosomoides bakeri*: a model for exploring the  
590 biology and genetics of resistance to chronic gastrointestinal nematode infections.  
591 *Parasitology.* 2009;136: 1565–1580. doi:10.1017/S0031182009006003

- 592 45. Farrell SH, Coffeng LE, Truscott JE, Werkman M, Toor J, de Vlas SJ, et al.  
593 Investigating the Effectiveness of Current and Modified World Health Organization  
594 Guidelines for the Control of Soil-Transmitted Helminth Infections. Clin Infect Dis.  
595 2018;66: S253–S259. doi:10.1093/cid/ciy002
- 596 46. Keller L, Palmeirim MS, Ame SM, Ali SM, Puchkov M, Huwyler J, et al. Efficacy and  
597 Safety of Ascending Dosages of Moxidectin and Moxidectin-albendazole Against  
598 Trichuris trichiura in Adolescents: A Randomized Controlled Trial. Clin Infect Dis.  
599 2020;70: 1193–1201. doi:10.1093/cid/ciz326
- 600 47. Partridge FA, Forman R, Bataille CJR, Wynne GM, Nick M, Russell AJ, et al.  
601 Anthelmintic drug discovery: target identification, screening methods and the role of  
602 open science. Beilstein J Org Chem. 2020;16: 1203–1224. doi:10.3762/bjoc.16.105
- 603 48. Todd MH. Six Laws of Open Source Drug Discovery. ChemMedChem. 2019;14: 1804–  
604 1809. doi:10.1002/cmdc.201900565
- 605
- 606

607 **Supporting information Captions**

608 **S1 File. Supporting information for synthetic chemistry**

609 **S2 File. Summary table of compound structures and assay results**

610
