1 **Structural requirements for dihydrobenzoxazepinone**  
2 **anthelmintics: actions against medically important and model**  
3 **parasites - *Trichuris muris*, *Brugia malayi*, *Heligmosomoides***  
4 ***polygyrus* and *Schistosoma mansoni***

5

6 Short title: (70 characters) Dihydrobenzoxazepinone efficacy on human and model helminth parasites

7

8 Authors:

9 Frederick A Partridge<sup>1¶</sup>, Carole JR Bataille<sup>2¶</sup>, Ruth Forman<sup>3¶</sup>, Amy E Marriott<sup>4¶</sup>, Josephine Forde-  
10 Thomas<sup>5¶</sup>, Cécile Häberli<sup>6,7¶</sup>, Ria L Dinsdale<sup>2</sup>, James DB O’Sullivan<sup>3,8</sup>, Nicky J Willis<sup>2,9</sup>, Graham M  
11 Wynne<sup>2</sup>, Helen Whiteland<sup>5</sup>, John Archer<sup>4</sup>, Andrew Steven<sup>4</sup>, Jennifer Keiser<sup>6,7</sup>, Joseph D Turner<sup>4,10</sup>,  
12 Karl F Hoffmann<sup>5</sup>, Mark J Taylor<sup>4,10</sup>, Kathryn J Else<sup>3\*</sup>, Angela J Russell<sup>2,11\*</sup> and David B Sattelle<sup>1\*</sup>

13 <sup>1</sup>Centre for Respiratory Biology, UCL Respiratory, Division of Medicine, University College London,  
14 London, United Kingdom

15 <sup>2</sup>Department of Chemistry, Chemistry Research Laboratory, University of Oxford, Oxford, United  
16 Kingdom

17 <sup>3</sup>Lydia Becker Institute of Immunology and Inflammation, Faculty of Biology, Medicine and Health,  
18 University of Manchester, Manchester, United Kingdom

19 <sup>4</sup>Centre for Drugs and Diagnostics, Department of Tropical Disease Biology, Liverpool School of  
20 Tropical Medicine, Liverpool, United Kingdom

21 <sup>5</sup>Institute of Biological, Environmental and Rural Sciences (IBERS), Aberystwyth University,  
22 Aberystwyth, Wales, United Kingdom.

23 <sup>6</sup>Department of Medical Parasitology and Infection Biology, Swiss Tropical and Public Health  
24 Institute, Basel, Switzerland.

25 <sup>7</sup>University of Basel, Basel, Switzerland.

26 <sup>8</sup>Henry Royce Institute, The University of Manchester, Manchester, United Kingdom

27 <sup>9</sup>Alzheimer's Research UK UCL Drug Discovery Institute, University College London, London,  
28 United Kingdom

29 <sup>10</sup>Centre for Neglected Tropical Diseases, Liverpool School of Tropical Medicine, Liverpool, United  
30 Kingdom.

31 <sup>11</sup>Department of Pharmacology, University of Oxford, Oxford, United Kingdom

32

33

34 \* Corresponding authors: Email [d.sattelle@ucl.ac.uk](mailto:d.sattelle@ucl.ac.uk) (DBS), [kathryn.else@manchester.ac.uk](mailto:kathryn.else@manchester.ac.uk) (KJE),  
35 [angela.russell@chem.ox.ac.uk](mailto:angela.russell@chem.ox.ac.uk) (AJR)

36 <sup>†</sup>These authors contributed equally.

37

## 38 **Abstract**

39 Nine hundred million people are infected with the soil-transmitted helminths *Ascaris lumbricoides*  
40 (roundworm), hookworm, and *Trichuris trichiura* (whipworm). However, low single-dose cure rates  
41 of the benzimidazole drugs, the mainstay of preventative chemotherapy for whipworm, together with  
42 parasite drug resistance, mean that current approaches may not be able to eliminate morbidity from  
43 Trichuriasis. We are seeking to develop new anthelmintic drugs specifically with activity against  
44 whipworm as a priority, and previously identified a hit series of dihydrobenzoxazepinone (DHB)  
45 compounds that block motility of *ex vivo* *Trichuris muris*. Here we report a systematic investigation  
46 of the structure-activity relationship of the anthelmintic activity of DHB compounds. We synthesised  
47 47 analogues, which allowed us to define features of the molecules essential for anthelmintic action,  
48 as well as broadening the chemotype by identification of dihydrobenzoquinolinones (DBQ) with  
49 anthelmintic activity. We investigated the activity of these compounds against other parasitic  
50 nematodes, identifying DHB compounds with activity against *Brugia malayi* and *Heligmosomoides*  
51 *polygyrus*. We also demonstrated activity of DHB compounds against the trematode *Schistosoma*  
52 *mansoni*, a parasite that causes schistosomiasis. These results demonstrate the potential of DHB and  
53 DBQ compounds for further development as broad-spectrum anthelmintics.

54

## 55 **Author summary**

56 Around a billion people are infected by the soil transmitted helminths *Ascaris*, hookworm and  
57 whipworm. In the case of whipworm, the benzimidazole drugs, which are distributed to school  
58 children in affected areas, have low cure rates. This means that finding an improved treatment for  
59 whipworm is a priority. We previously identified five DHB compounds in a screen for new  
60 compounds active against whipworm. Here we systematically dissect these molecules, making 47  
61 modified versions of the compounds. This allowed us to define the features of these compounds that  
62 are important for activity against whipworm. We also demonstrate activity of DHB compounds  
63 against other parasitic nematodes, and against *Schistosoma mansoni*, a trematode parasite. These

64 results show the potential for further development of DHB compounds as broad-spectrum  
65 anthelmintics.

66

## 67 **Introduction**

68 900 million people are infected with soil-transmitted helminths causing a global burden of around two  
69 million disability-adjusted life years [1,2]. Because of this, the World Health Organization has set a  
70 goal to achieve and maintain elimination of soil-transmitted helminth morbidity by 2030 [3]. Huge  
71 mass drug administration efforts are underway, distributing hundreds of millions of doses of  
72 benzimidazole drugs (albendazole and mebendazole) to school-age children in affected areas annually  
73 or biannually as preventative chemotherapy (PCT).

74 Benzimidazole drugs are partially effective against whipworm (*Trichuris trichiura*) when  
75 administered as a course of treatment, reaching cure rates of around 43% [4]. However, for mass drug  
76 administration, practicalities and scale mean that only one dose is given. In contrast to *Ascaris*  
77 *lumbricoides*, where a single dose of benzimidazole drugs cures around 90-95% of infected  
78 individuals, the single dose cure rate for whipworm is low, around 30% [5,6]. The current mass drug  
79 administration protocol may therefore not be able to break transmission and reduce the prevalence of  
80 moderate to heavy whipworm infections to below 2% as required to eliminate morbidity [3]. Due to  
81 the poor single dose efficacy of the benzimidazole drugs against whipworm, there have been  
82 extensive efforts to identify more efficacious drug combinations [6]. Of these the most promising to  
83 date is a combination of albendazole plus the N-type nicotinic acetylcholine receptor agonist oxantel  
84 pamoate, which has a single dose cure rate reported to be between 31 and 83% [7–10]. A second drug,  
85 moxidectin, also shows promise to be added to albendazole for improved control of whipworm [7].

86 Of concern, however, is the possibility that drug resistance may become prevalent, derailing the push  
87 towards control of whipworm. Currently there is only indirect evidence of this possibility. In a meta-  
88 analysis, it has been shown that egg reduction rates and cure rates after albendazole treatment are  
89 decreasing over time [11]. Polymorphisms in the beta-tubulin gene that are associated with

90 benzimidazole resistance are found in populations of human whipworm, and the frequency of these  
91 polymorphisms increased after albendazole treatment [12,13]. The Starworms project will establish a  
92 valuable system to monitor benzimidazole drug efficacy and the potential emergence of anthelmintic  
93 resistance due to soil-transmitted helminth control programs [14]. Because of these two problems –  
94 low efficacy of existing drugs against whipworm, and concerns about development of resistance to  
95 these drugs – we and others have been pursuing a strategy of identifying new anti-whipworm  
96 compounds, via a mixture of repurposing and *de novo* small molecule screening [15–22].

97 Beyond soil transmitted helminths (STH), lymphatic filariasis and schistosomiasis are two medically  
98 important tissue helminthiases prioritised for global or regional elimination via mass PCT, as outlined  
99 in the WHO Roadmap 2030 implementation targets [23]. A related filarial nematode, *Onchocerca*  
100 *volvulus*, is also targeted for regional elimination. Reliance on a few, or in the case of onchocerciasis  
101 and schistosomiasis, a single chemotherapeutic agent (ivermectin and praziquantel, respectively) used  
102 ‘en masse’ for PCT, is a vulnerability of current elimination strategies, considering the potential for  
103 development of drug resistance. As with STH, annual or semi-annual mass drug administrations  
104 extending upward of 20 years are required to break transmission with current drugs due to incomplete  
105 adulticidal / selective larvicidal activity profiles of the implemented anti-filarial or schistosomicidal  
106 agents. Alternative strategies, for instance, development of a short-course curative treatment for  
107 filariasis, would be a step-change to reduce elimination time frames [24,25].

108 We previously described a hit series of five dihydrobenz[e][1,4]oxazepin-2(3*H*)-one (DHB)  
109 compounds with anthelmintic activity against *ex vivo* *T. muris* [18]. Here we report our progress in  
110 expanding this hit series and understanding the relationship between structure and anthelmintic  
111 activity. We also extend our investigations of the activity of the DHB compounds against *Brugia*  
112 *malayi*, a causative agent of lymphatic filariasis, *Heligmosomoides polygyrus bakeri*, a mouse  
113 gastrointestinal nematode model, and the human blood fluke, *Schistosoma mansoni*.

114

## 115 **Materials and Methods**

### 116 **Ethics statement**

117 All experimental procedures involving *T. muris* were approved by the University of Manchester  
118 Animal Welfare and Ethical Review Board and performed within the guidelines of the Animals  
119 (Scientific Procedures) Act, 1986.

120 All experiments involving *Brugia malayi* were approved by the ethical committees of the University  
121 of Liverpool and Liverpool School of Tropical Medicine (LSTM) and conducted under Home Office  
122 Animals (Scientific Procedures) Act 1986 (UK) requirements and the ARRIVE guidelines.

123 The work on *Heligmosomoides polygyrus* was approved by the local veterinary agency, based on  
124 Swiss cantonal and national regulations (permission no. 2070).

125 For experiments involving *Schistosoma mansoni*, all procedures performed on mice adhered to the  
126 United Kingdom Home Office Animals (Scientific Procedures) Act of 1986 (project licenses PPL  
127 40/3700 and P3B8C46FD) as well as the European Union Animals Directive 2010/63/EU and were  
128 approved by Aberystwyth University's (AU) Animal Welfare and Ethical Review Body (AWERB).

129

### 130 **Chemical synthesis**

131 Compounds were synthesised from commercially available starting materials, and fully characterised  
132 by Nuclear Magnetic Resonance Spectroscopy and Mass Spectrometry. Full experimental details and  
133 analytical data are provided in the Supporting Information.

### 134 **Isolation of *T. muris* adults**

135 Male and female severe combined immunodeficient (SCID) mice were bred in house at the University  
136 of Manchester and used at age 8-12 weeks. Mice were maintained at a temperature of 20-22°C in a  
137 12h light, 12h dark lighting schedule, in sterile, individually ventilated cages with food and water *ad*  
138 *lib.*

139 The parasite was maintained and the infectivity of the administered *T. muris* eggs was assessed as  
140 previously described [26,27]. For generation of adult *T. muris* worms 150 infective eggs were given  
141 per oral gavage in water to each SCID mouse. 35 days post infection mice were sacrificed via  
142 schedule one methods. At necropsy the caecae and colons were removed, opened longitudinally and  
143 washed with pre-warmed RPMI-1640 media supplemented with penicillin (500U/ml) and  
144 streptomycin (500µg/ml). Adult *T. muris* worms were gently removed using fine forceps under a  
145 dissecting microscope and maintained at 37°C in RPMI-1640 media supplemented with penicillin  
146 (500U/ml) and streptomycin (500µg/ml).

#### 147 *T. muris* adult motility assay

148 Single adult worms were placed in microplate wells containing 100 µL of RPMI-1640 medium,  
149 penicillin (500 U/mL), streptomycin (500 µg/mL) and 1 µl (1% v/v) dimethylsulfoxide (DMSO) or  
150 compound dissolved in DMSO. Assay plates were incubated at 37°C with 5% CO<sub>2</sub>. The INVAPP  
151 system was used to quantify worm motility [28,29]. Movies of the whole plate were recorded (20  
152 frames, 100 ms interval) and motility determined by thresholding the variance of each pixel in the  
153 image over time [30]. Compounds were initially tested at 100 µM. Those showing activity were also  
154 tested at lower concentrations, typically 50 and 75 µM, and EC<sub>50</sub> estimates were measured for  
155 compounds of interest using the a log-logistic model and the R package *drc* [31].

#### 156 *B. malayi* parasite production

157 The life cycle of *B. malayi* was maintained in *Aedes aegypti* mosquitoes (Liverpool strain) and inbred  
158 Mongolian gerbils housed at the Biomedical Services Unit, University of Liverpool under specific  
159 pathogen-free conditions. Microfilariae were harvested from experimentally infected Mongolian  
160 gerbils via catheterization under anaesthesia and fed to mosquitoes in human blood at 20,000 mf / ml  
161 using artificial membranes heated to 37 °C. Mosquitoes were reared for 14 days with daily sugar-  
162 water feeding to allow development to larval stage (*BmL3*). At day 14, *BmL3* were collected from  
163 infected mosquitoes by stunning at 4 °C, crushing and concentrating using a Baermann's apparatus  
164 and RPMI-1640 media. Male IL-4Rα<sup>-/-</sup>IL-5<sup>-/-</sup> BALB/c mice (gifted by Prof. Achim Hoerauf,

165 University of Bonn, Germany) aged 6-8 weeks, weighing 18-24 g were infected intraperitoneally with  
166 150 *BmL3* and left for 12 weeks to develop to patent adult stage as previously detailed [32].

### 167 ***B. malayi* microfilaria assay**

168 *Brugia malayi* microfilariae (mf) were harvested from Mongolian gerbils via intraperitoneal lavage  
169 and purified using PD-10 columns (Amersham). Mf densities were then adjusted to 8,000 / well in  
170 complete medium consisting of RPMI-1640 supplemented with 1% penicillin-streptomycin, 1%  
171 amphotericin B and 10% FBS within 96 well plates.

172 33 test compounds (10 mM stock in 100% DMSO) were initially tested against mf. Compounds were  
173 diluted to 10  $\mu$ M in complete medium and added to the plated mf. Three replicates were used for each  
174 compound, and each plate included ivermectin (50  $\mu$ M) as a positive control and DMSO (0.5% v/v) as  
175 a negative control. Assay plates were incubated for 6 days at 37°C, 5% CO<sub>2</sub>. Mf were scored daily for  
176 motility as a proxy of nematode health, using a 5 point scoring system (4 = fully motile, 0 = no  
177 motility) as described previously [33]. Compounds found to reduce motility were progressed to a  
178 secondary screen, whereby the MTT assay was employed at day 6 to assess parasite viability  
179 quantitatively. For this, excess media was removed from wells and mf were incubated with 0.5 mg/ml  
180 MTT (3-(4,5-Dimethylthiazol-2-yl)-2,5-Diphenyltetrazolium Bromide (Merck) in PBS at 37°C for 90  
181 min. After washing in PBS and centrifugation, mf pellets were incubated in 100% DMSO for 1 h at  
182 37°C to solubilize the blue formazan product. Samples were read at OD 490 nm on a 96-well plate  
183 reader (Varioskan, Bio-Rad). Compounds exhibiting the greatest activity on parasite viability were  
184 progressed further for drug dose titration assays.

### 185 ***B. malayi* adult assay**

186 Adult female *B. malayi* of 12-24 weeks of age were isolated from susceptible *IL-4R $\alpha$ <sup>-/-</sup>IL-5<sup>-/-</sup>*  
187 immunodeficient mice, washed in PBS and added to lymphatic endothelial cell co-cultures  
188 (HMVECdly; LEC; Lonza) at a density of two parasites per well. Successful test compounds from the  
189 mf assay were diluted to 10  $\mu$ M and added to the trans-wells in 6 ml endothelial basal media with  
190 supplements (EGM-2 MV; Lonza). Twelve replicates (n = 6 wells) were set up per group, with



191 flubendazole (10  $\mu$ M; Sigma) and DMSO (0.5% v/v) added as controls. Plates were incubated for 14  
192 days at 37 °C, 5% CO<sub>2</sub> with daily motility scoring, as above. Individual parasites were taken for MTT  
193 analysis at day 14.

#### 194 *Heligmosomoides polygyrus*

195 *H. polygyrus* larvae (L3) were obtained by filtering the faeces of infected mice and cultivating the  
196 eggs on an agar plate for 8-10 days in the dark at 24°C. 30-40 L3 were placed in each well of a 96-  
197 well plate for each compound in the presence of 100  $\mu$ l RPMI 1640 (Gibco, Waltham MA, USA)  
198 culture medium supplemented with 5% amphotericin B (250  $\mu$ g/ml, Sigma-Aldrich, Buchs,  
199 Switzerland) and 1% penicillin 10,000 U/ml, and streptomycin 10 mg/ml solution (Sigma-Aldrich,  
200 Buchs, Switzerland) with the test drugs (100  $\mu$ M concentration). Worms were kept at room  
201 temperature for 72 h and for evaluation 50-80  $\mu$ l of hot water ( $\approx$ 80°C) was added to each well and the  
202 larvae that responded to this stimulus (the moving worms) were counted. The proportion of larval  
203 death was determined. Compounds were tested in duplicate at 100  $\mu$ M. Control wells were included  
204 in each experiment, which included the highest amount of solvent (1% DMSO).

#### 205 *S. mansoni* Roboworm assay

206 *Biomphalaria glabrata* (NMRI and the previously described pigmented strains [34]) infected  
207 previously with *S. mansoni* (Puerto Rican strain) miracidia were exposed for 1.5 hrs under light at 26  
208 °C. Cercariae were collected and mechanically transformed into schistosomula as previously  
209 described [35]. Mechanically-transformed schistosomula were subsequently prepared for high  
210 throughput screening (HTS) on the Roboworm platform according to Crusco *et. al.* [36]. All  
211 compounds were tested in duplicate during dose response titrations (50  $\mu$ M, 40  $\mu$ M, 30  $\mu$ M, 20  $\mu$ M,  
212 10  $\mu$ M in 0.625% DMSO). Assay controls included 10  $\mu$ M (in 0.625% DMSO) auranofin (positive  
213 control; Sigma-Aldrich, UK) and 0.625% DMSO (negative control). Schistosomula phenotype and  
214 motility were quantified after 72 hr co-culture with compounds as previously described [37].  
215 Compounds passing both phenotype (-0.15) and motility (-0.35) thresholds were classified as hits. Z'  
216 scores for all assays were above 0.35 [38].

217

## 218 Results

### 219 Novel DHB Chemistry

220 We have recently reported the identification of five dihydrobenzoxazepinone (DHB) hit compounds  
221 as a new family of molecules active against *T. muris* adult motility [18]. Further, one of the  
222 compounds **OX02983** was also found to be efficacious at reducing the ability of eggs to establish  
223 infection *in vivo*. As we identified a limited number of active DHB family members in the first  
224 instance via a library screen, we aimed to investigate the DHB chemotype systematically with the  
225 goal of understanding their structure-activity relationships (SARs) and improving potency. **OX02983**  
226 was used as a starting point of our investigation.

227

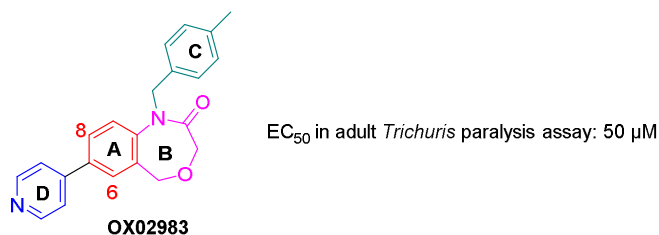

229 **Fig 1. Structure of OX02983 highlighting the four cycles labelled A-D**

230

231 The synthesis used to prepare **OX02983** was adapted to systematically alter all the different cycles **A-**  
232 **D**, as shown in Fig 1. The first step was a reductive amination of the requisite aminobromobenzoate  
233 with the desired aldehyde to install cycles **A** and **C**. This was followed by a ring-closure step to  
234 generate cycle **B** and finally a cross-coupling reaction to add cycle **D** (Scheme 1).

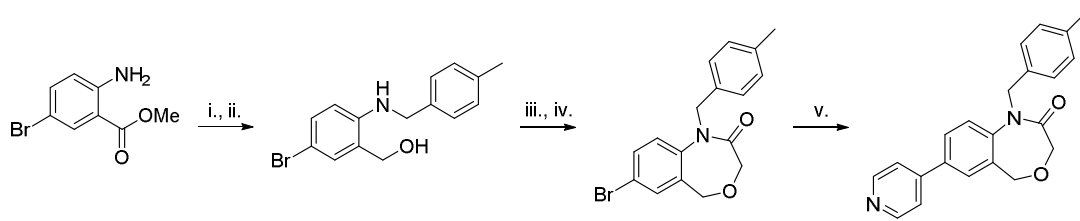

236 **Scheme 1. Representative scheme for synthesis of DHB compounds.** i. 4-methylbenzaldehyde (1.5  
237 eq.), AcOH (0.5 eq.), NaBH(OAc)<sub>3</sub>, CH<sub>2</sub>Cl<sub>2</sub>, 0 °C to rt, 48 h; ii. LiAlH<sub>4</sub> (1 M in THF, 3.5 eq.); iii.  
238 chloroacetyl chloride (2.0 eq.), NEt<sub>3</sub> (2.0 eq.), THF, 0 °C to rt, 16 h; iv. NaOH (10 N, aq.), rt, 2 h; v.  
239 4-pyridyl-B(OH)<sub>2</sub> (1.1 eq.), Pd(dppf)Cl<sub>2</sub> (5 mol%), K<sub>2</sub>CO<sub>3</sub> (3.0 eq.), 1,4-dioxane/H<sub>2</sub>O (4:1), 90 °C, 18  
240 h.

241 It was decided to conduct a systematic structure activity relationship (SAR) investigation and alter the  
242 four different cycles within the structure of **OX02983** to understand their importance in the activity  
243 against *T. muris* with a view to improving efficacy. As the synthesis is linear, it was logical to  
244 investigate from **A** to **D**. We therefore started with core **B**, to ascertain the importance of  
245 regiochemistry and relative orientation of the substituents (Table 1). All the prepared compounds  
246 were screened using an automated adult *T. muris* motility assay [28] at 100 µM. Active compounds  
247 were also tested at lower concentrations and/or an EC<sub>50</sub> value determined to assess their relative  
248 activity.

249 Using the appropriate starting materials (see S1 File for details of the syntheses), the different  
250 structural analogues **OX03701**, **OX03707** (where the 4-pyridyl ring is in position 8 and 6 of the  
251 bicyclic core respectively, see Fig 1) and **OX03704** (the reverse amide equivalent of **OX02983**) were  
252 prepared using a similar synthesis to **OX02983** (Table 1). Interestingly, none of the structural  
253 analogues exhibited any activity in our *ex vivo* adult *T. muris* motility assay, revealing that the  
254 regiochemistry within **OX02983** is important for its activity. The next step was to investigate cycle **C**;  
255 a small set of amines was used in the reductive amination step to prepare analogues **OX04118**,  
256 **OX04120**, **OX02993**, **OX03825**, **OX03144** bearing methyl, cyclopropyl, cyclohexyl, benzyl and *p*-  
257 trifluoromethylbenzyl groups respectively. From those, only the cyclohexyl substituted derivative  
258 **OX02993** and the *p*-trifluoromethylbenzyl substituted derivative **OX03144** showed activity in the

259 motility assay, with EC<sub>50</sub> values of 52 μM and 26 μM respectively. The next step was to vary cycle **D**,  
260 while keeping cycles **A-C** constant to allow a comparison with **OX02983**. Suzuki reactions were  
261 therefore carried out on the 7-bromo precursor with an array of boronic acids and esters. The  
262 regioisomers of the pyridyl ring (**D**) were tolerated with *meta* and *para* giving the best activity.  
263 Analogues where the pyridyl ring was replaced with an aryl substituent were all inactive, be they  
264 unsubstituted (**OX03596**), substituted with an electron withdrawing group (4-F, **OX03600**), or an  
265 electron donating group (4-Me, **OX03601**) (Table 1). Different heterocycles were also trialled in place  
266 of the pyridine; a similar level of activity was obtained with the isosteric thiazole (**OX04122**, EC<sub>50</sub> of  
267 45 μM) and the methylimidazole (**OX04123**, EC<sub>50</sub> of 68 μM) analogues. Substituting with a  
268 pyrimidine (**OX03705**) led to a loss of activity, leading us to hypothesize that the basicity of the  
269 substituent may be of importance to the activity. Following this, we prepared phenylamine and benzyl  
270 amine-substituted analogues **OX03824** and **OX03710**, but neither exhibited activity against *T. muris*,  
271 suggesting incorporating a linker between cycles **A** and **D** was not tolerated. We then turned our  
272 interest to substituted pyridyl, and although the methoxy substituted pyridyl (**OX04116**) was not  
273 active, the amino pyridyl **OX04117** displayed modestly improved activity than **OX02983** (EC<sub>50</sub> 26  
274 μM), which may be related to its moderately higher basicity.

275 In an effort to improve the efficacy further, we looked at more drastic modification to core **B**, by  
276 contracting the ring by removing the oxygen atom. Forge (Cresset) was used to overlay **OX02983** and  
277 its six-membered ring analogue **OX3699**; a good fit was obtained (~79% similarity) suggesting  
278 dihydrobenzoquinolinones (DBQ) as possible candidates for further improvement (Fig 2).

279

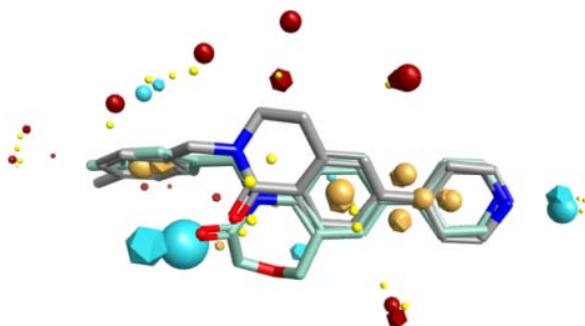

280

281 **Fig 2.** Overlay of **OX02983** (light blue) and **OX3699** (grey); blue spheres represent negative  
282 electrostatic field, red spheres represent positive electrostatic field, brown spheres represent  
283 hydrophobicity and small yellow sphere represent the van der Waals force.

284

285 DBQs have been investigated quite extensively in medicinal chemistry; examples have been reported  
286 as antiviral agents through inhibition of HIV replication [39,40]. Other analogues were found to  
287 inhibit WDR5 protein-protein interactions, leading to inhibition of cancer cell proliferation [41–43].<sup>3-</sup>  
288 <sup>5</sup>

289 It was decided to prepare a small number of compounds only using those substituents and comparable  
290 regiochemistry that gave the most potent analogues so far.

291 The synthesis started with substitution at *N2* of 6-bromo-3,4-dihydroisoquinolinone with 4-  
292 methylbenzyl bromide, followed by a Suzuki coupling reaction with the requisite boronic acid to  
293 afford the desired ring contracted **OX02983** mimic (Scheme 2).

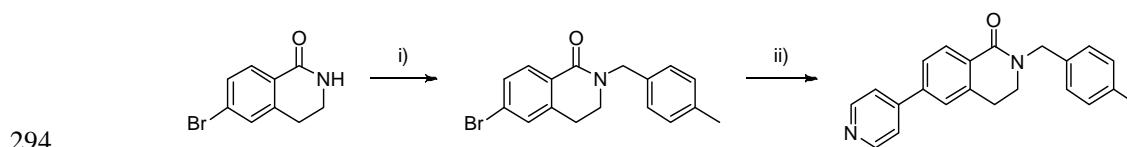

295 **Scheme 2.** Synthesis of **OX3699**: Reagents and conditions: i) 4-methylbenzyl bromide (2.0 eq.), NaH  
296 (1.5 eq.), DMF, rt, 16 h (96 %); ii) 4-pyridyl-B(OH)<sub>2</sub> (1.1 eq.), Pd(dppf)Cl<sub>2</sub> (5 mol%), K<sub>2</sub>CO<sub>3</sub>  
297 (3.0 eq.), 1,4-dioxane/H<sub>2</sub>O (4:1), 90 °C 18 h.

298 The DBQ bearing the 3-and 4-pyridyl substituents (**OX03699** and **OX04236**) were active in the  
299 motility assay and led to similar EC<sub>50</sub>s to the best results from the DHB series (with EC<sub>50</sub> values of 21  
300 μM and 46 μM respectively). Unfortunately, as soon as we moved away from the simple pyridyl  
301 substituent, all activity in the motility assay was lost again. The 2-amino pyrid-5-yl, the best example  
302 of ring **D** in the DHB series, was surprisingly inactive (**OX04238** EC<sub>50</sub> >100 μM vs. **OX04117** EC<sub>50</sub>  
303 26 μM). Similarly, the methyl imidazole and the thiazole-substituted analogues (**OX04237** and  
304 **OX4739** respectively), also exhibited no activity in the motility assay, in contrast to their DHB  
305 counterparts suggesting that SARs did not correlate between the DHB and DBQ series. As the best

306 results from the DQB and the DHB series were largely similar, we felt that this alternative core was  
307 not going to enhance substantially the potency of the compounds.  
308 Collectively, these data have improved our understanding or provided insights into the SARs of the  
309 DHB/DQB family of compounds. The structure of cycles **A** and **B** in **OX02983** were found to be  
310 critical to activity; variations of the toluyl group for ring **C** generally also led to inactive compounds.  
311 Some variations of cycle **D** were tolerated, and there appeared to be a preference for a basic site  
312 within the substituent. However, although we were able to alter the structure resulting in loss of  
313 activity, we were unable to improve, only retain, activity.  
314 Apart from the representative compounds presented in Table 1, further similar analogues and all  
315 synthetic precursors were prepared and tested (S2 File). Together it gave us a library of 47 compounds  
316 that could then be used against different parasite species to understand whether these compound series  
317 showed broad-spectrum anthelmintic activity.  
318  
319

| Compound | Structure                                                                           | EC <sub>50</sub> (μM) in <i>T. muris</i> adult motility assay |
|----------|-------------------------------------------------------------------------------------|---------------------------------------------------------------|
| OX02983  | 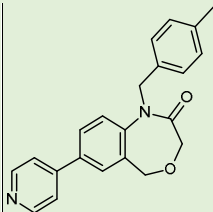 | 50                                                            |
| OX03701  |  | no activity                                                   |
| OX03707  |  | ≥ 100                                                         |

|         |                                                                                     |           |
|---------|-------------------------------------------------------------------------------------|-----------|
| OX03704 | 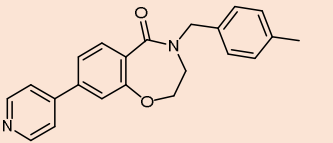   | $\geq 75$ |
| OX03825 |    | $\geq 75$ |
| OX03144 |    | 26        |
| OX04118 |    | $\geq 75$ |
| OX04120 |   | $\geq 75$ |
| OX02993 |  | 52        |
| OX04115 |  | 72        |
| OX03153 |  | 57        |

|         |                                                                                     |             |
|---------|-------------------------------------------------------------------------------------|-------------|
| OX03596 | 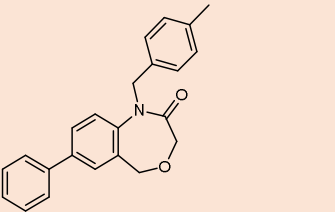   | no activity |
| OX03600 |    | no activity |
| OX03601 |    | no activity |
| OX03705 |   | no activity |
| OX04122 |  | 45          |
| OX04123 |  | 68          |
| OX03710 |  | no activity |
| OX03824 |  | no activity |



|         |                                                                                     |             |
|---------|-------------------------------------------------------------------------------------|-------------|
| OX04116 | 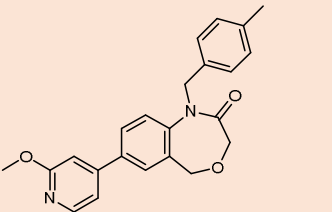   | no activity |
| OX04117 |    | 26          |
| OX03146 |    | 35          |
| OX03699 |    | 21          |
| OX04236 |   | 42          |
| OX04238 |  | no activity |
| OX04237 |  | no activity |
| OX04239 |  | no activity |

320

321 **Table 1. Structures and EC<sub>50</sub> of representative DHB compounds in the *T. muris* adult motility**  
 322 **assay.** All compounds investigated in this study are described in the S2 File. No activity means no  
 323 clear reduction in motility when tested at 100 μM. Where an EC<sub>50</sub> estimate is shown, it was calculated  
 324 using a log-logistic model using the R package drc [31].

325

## 326 DHB compounds are active in models of a range of helminth infections

327 Whipworm is only one of many widely prevalent human helminth infections, and there are continuing  
328 efforts to improve drug treatments for these diseases. There have been recent successes, such as the  
329 approval of the veterinary medicine moxidectin for onchocerciasis [44], and the establishment of the  
330 triple therapy albendazole, diethylcarbamazine citrate plus ivermectin as an improved microfilaricide  
331 treatment for lymphatic filariasis suitable for mass drug administration [45,46]. However, sub-optimal  
332 efficacy, problematic contraindications, and concerns that mass drug administration could lead to the  
333 spread of drug resistance, mean that repurposing of veterinary anthelmintics, improving drug  
334 combinations, and the development of new anthelmintics remain priorities [47–49].

335 Development of a new anthelmintic is a long and expensive process, and funding for neglected  
336 tropical diseases is limited. Furthermore, multiple parasitic helminths, for example the soil transmitted  
337 nematodes, *Ascaris*, *Trichuris* and the human hookworms, the vector transmitted filarial nematodes,  
338 and the *Schistosoma* trematodes, are often endemic in the same regions. It would, therefore, be helpful  
339 if a new drug would have activity against several target species and which worked across the  
340 Nematoda and Platyhelminthes phyla. We therefore wanted to investigate whether the DHB series of  
341 compounds had a range of activities beyond *Trichuris*.

### 342 Activity against *B. malayi*

343 *B. malayi* is one of the tissue dwelling nematode parasites responsible for human lymphatic filariasis  
344 [50]. We first examined single dose efficacy of 33 DHB compounds at 10  $\mu$ M against the *B. malayi*  
345 mf larval stage, with motility scored every 24 hours. The results after six days are shown in Fig 3A.  
346 Ivermectin was used as a positive control in the mf assay. **OX02983** showed the most promise in this  
347 assay, reducing average motility to a score of 1. From this primary screen, 15 compounds that were  
348 determined to significantly impact *B. malayi* mf motility, plus an additional 5 with no discernible  
349 effect, were retested in a secondary screen (Fig 3B). These results confirmed the significant reduction  
350 in motility caused by 11 compounds and confirmed the paralytic effect of **OX02983**. After six days  
351 drug exposure, mf were also tested for metabolic activity, a measure of parasite viability, using the  
352 MTT assay (Fig 3C). **OX02983** and **OX03153**, in particular, showed activity in this assay,

353 significantly reducing *B. malayi* mf MTT reductase activity on average by 53% and 82%, respectively  
354 (1-way ANOVA with Holm-Sidak's multiple comparison tests,  $P < 0.01$  and  $P < 0.0001$ ). To determine  
355 the dose-dependent efficacy of **OX02983** and **OX03153**, they were tested in a concentration response  
356 6-day experiment (dose range 0.016-50  $\mu\text{M}$ ) using MTT reductase activity as a quantitative viability  
357 readout (Fig 3D,E). From this an  $\text{EC}_{50}$  concentration of 5.5  $\mu\text{M}$  was determined for **OX02983** and  
358 26.7  $\mu\text{M}$  for **OX03153**.

359 Due to their efficacy against *B. malayi* mf, **OX02983** and **OX03153** were advanced for *in vitro*  
360 activity against adult *B. malayi*, utilising a novel, long-term adult worm lymphatic endothelial cell  
361 bilayer co-culture system. Adult female *B. malayi* exposed to vehicle control retained full survival  
362 and motility in culture over 14 days whereas the positive control, flubendazole (10  $\mu\text{M}$ ) mediated  
363 complete paralytic activity by day 14 (Kruskal Wallis with Dunn's multiple comparisons tests,  
364  $P < 0.001$ ) and significantly reduced metabolic activity by an average of 72% (1-way ANOVA with  
365 Holm-Sidak's multiple comparison tests,  $P < 0.001$ ) (Fig 3F-G). **OX02983** (10  $\mu\text{M}$ ) also mediated  
366 significant anti-filarial activities against adult *B. malayi* by day 14. Motility was completely hindered  
367 in 4/6 adult parasites by **OX02983** (Kruskal Wallis with Dunn's multiple comparisons tests,  $P < 0.001$ ),  
368 whilst **OX03153** mediated a 50% partial reduction in adult motility. **OX02983** also significantly  
369 impacted on adult female *B. malayi* metabolic activity, on average by 41% (1-way ANOVA with  
370 Holm-Sidak's multiple comparison tests,  $P < 0.05$ ). Taken together, these results are encouraging  
371 because they show that compounds that are active against *T. muris* (a clade I nematode according to  
372 the phylogeny of Blaxter) are also active against evolutionarily-distant nematodes, as *B. malayi* is a  
373 clade III nematode [51].

374

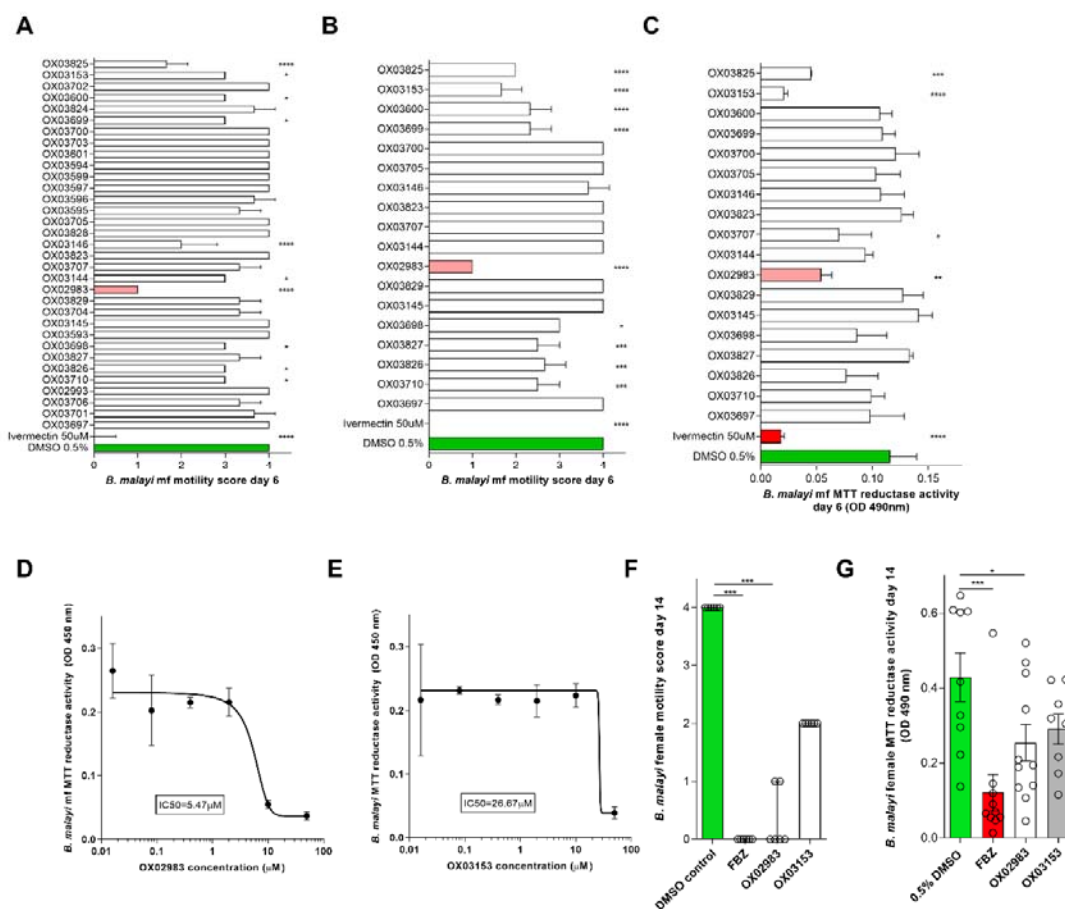

375

376 **Fig 3. Activity of 33 DHB compounds against *B. malayi* microfilariae and adults.** (A) Primary  
 377 screen – assessment of *B. malayi* mf motility (5 point scoring system) after six days continuous  
 378 exposure to 35 test compound screened at 10 µM in triplicate. Ivermectin (50 µM) was the positive  
 379 control. (B) Confirmatory mf motility and (C) metabolic activity screening of 15 active compounds  
 380 identified in (A) and five inactive compounds (10µM in triplicate). (D, E) 50% inhibitory  
 381 concentration (EC<sub>50</sub>) assays of active compounds **OX02983** and **OX03153** on *B. malayi* microfilarial  
 382 metabolic activity after 6-day continuous exposure. Metabolic activity (C-E) was assessed by  
 383 colorimetric MTT assay, data is optical density of mf extracts measured at 490nm. (F) Effects on adult  
 384 female *B. malayi* motility and (G) metabolic activity following 14 day continuous exposure to  
 385 **OX02983** or **OX03153** (10 µM). Flubendazole (10 µM) was used as a positive control in the assay.  
 386 Data plotted is mean ± SD of 3 replicates (A-E) median and range of 6 replicates (F) and mean ±  
 387 SEM of 9-11 replicates (G). Significant differences were determined by 1-way ANOVA with Holm-

388 Sidak multiple comparisons test (A-C and G) or Kruskal-Wallis with Dunn's multiple comparisons  
389 test (F). Significance is indicated \*\*\*\*P<0.0001, \*\*\*P<0.001, \*\*P<0.01 and \*P<0.05.

390

391 Activity against *H. polygyrus*

392 *H. polygyrus bakeri* is an intestinal nematode parasite of laboratory mice [52]. It is a strongylid  
393 nematode, related to human hookworm species. 31 DHB compounds were tested at 100  $\mu$ M against *ex*  
394 *vivo* *H. polygyrus* L3 stage worms (n = 2). The results are shown in Fig 4. The cut-off used to  
395 determine hits in this assay is 50% larval death [17]. Two compounds, **OX03594** and **OX03599**,  
396 exceeded this level of larval death and were therefore considered active. They did not however reach  
397 the threshold for good activity (75%). Given the modest activity of these compounds against *H.*  
398 *polygyrus* we have not further pursued this direction at this point. Activity of DHB compounds  
399 against nematodes in three of the five clades of the phylum Nematoda, according to the phylogeny of  
400 Blaxter, supports the potential for development of a pan-nematode control agent from this compound  
401 series [51].

402

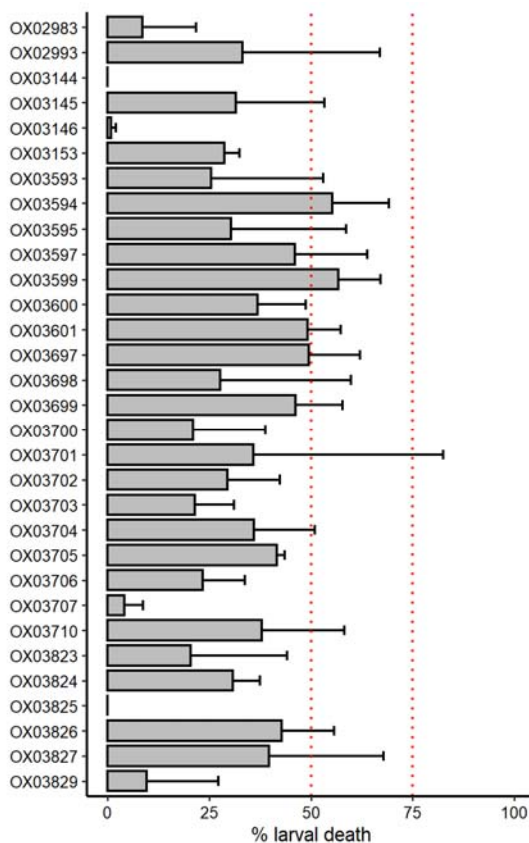

403

404 **Fig 4. Measurement of the activity of 31 DHB compounds against *H. polygyrus* L3 stage worms.**

405 Larval death is measured as the proportion of worms that respond to stimulus. Compounds were  
406 tested in duplicate at 100  $\mu$ M. Dashed lines indicates the cut-off (50%) used to determine hits in this  
407 assay and the cut-off for good activity (75%) [17]: <50%, not active, 50-75% moderate activity,  
408 >75% good and >90% excellent activity.

409

410 Activity against *S. mansoni* schistosomula

411 Compared to *T. muris*, *H. polygyrus* and *B. malayi*, which are all parasitic worms within the phylum  
412 Nematoda, *S. mansoni* is a more evolutionary distinct helminth – a trematode within the  
413 Platyhelminthes phylum. It is a human parasite that infects around 150 million people, causing  
414 schistosomiasis [1]. Praziquantel, an N-acylated quinoline-piperazinone, is the basis of  
415 schistosomiasis treatment and is safe and efficacious against adult worms of all *Schistosoma* spp. as a  
416 monotherapy. However, there is concern about the emergence of drug resistance [53] and praziquantel

417 has lower efficacy against juvenile forms, so immature parasites may survive drug exposure and  
418 continue the infection.

419 We screened 30 DHB compounds against *S. mansoni* schistosomula at 50  $\mu$ M using the RoboWorm  
420 system. This is an imaging-based screen that measures two parameters, motility and “phenotype,” an  
421 assessment of morphological and other features [37]. Auranofin, an inhibitor of *S. mansoni*  
422 thioredoxin glutathione reductase (TGR) activity [54] was the positive control in this experiment. The  
423 results are shown in Fig 5. The cut-offs for defining hit compounds in this assay have been previously  
424 defined [37,55]. Nine compounds were hits in this assay for both motility and phenotype  
425 measurements. Concentration-response curves were measured for these compounds (Table 2), with  
426 EC<sub>50</sub> values in the range 14-41  $\mu$ M. It is encouraging that DHB compound series members show  
427 activity against such evolutionarily distant pathogens to whipworm, particularly as DHB compounds  
428 show little or no cytotoxicity in mammalian cell culture – so these compounds are not broadly toxic  
429 [18].

430

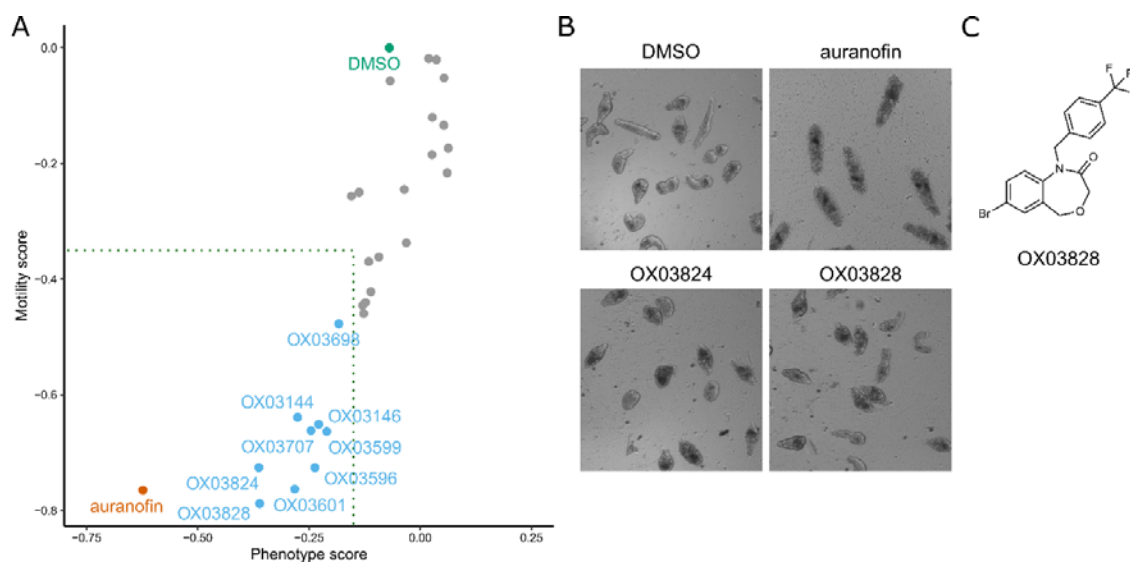

431

432 **Fig 5. Measurement of the activity of 30 DHB compounds against *S. mansoni* schistosomula**  
433 **using the RoboWorm platform.** (A) Each point is the measured effect of one compound on the two  
434 parameters – motility and phenotype. The phenotype score is calculated by a computational model  
435 that assesses morphological and texture properties of the schistosomula [37]. Compounds were

436 screened at 50  $\mu$ M. Auranofin was the positive control (screened at 10  $\mu$ M). Dotted box indicates the  
437 threshold for activity in this assay: -0.15 for phenotype and -0.35 for motility; compounds must be  
438 below this threshold for both parameters to be considered a hit [37,55]. Compounds were screened in  
439 duplicate on two or three separate occasions and the data represents the average scores of these  
440 experiments. (B) Representative images of schistosomula treated with controls, **OX03824** and  
441 **OX03828**. (C) Structure of **OX03828**. The structure of **OX03824** is shown in Table 1.

442

443

| Compound | EC <sub>50</sub> in <i>S. mansoni</i> schistosomula Roboworm assay<br>( $\mu$ M) |                |
|----------|----------------------------------------------------------------------------------|----------------|
|          | phenotype score                                                                  | motility score |
| OX03144  | 28.4                                                                             | 28.0           |
| OX03146  | 25.5                                                                             | 25.6           |
| OX03596  | 29.1                                                                             | 26.8           |
| OX03599  | 14.2                                                                             | 18.3           |
| OX03601  | 24.4                                                                             | 20.6           |
| OX03698  | 28.5                                                                             | 26.6           |
| OX03707  | 32.7                                                                             | 29.3           |
| OX03824  | 40.9                                                                             | 36.8           |
| OX03828  | 25.7                                                                             | 20.7           |

444



445 **Table 2. EC<sub>50</sub> values for compounds active in the *S. mansoni* schistosomula Roboworm assay.**

446 Compounds were screened at 10, 20, 30, 40 and 50 µM and EC<sub>50</sub> values were calculated for each of  
447 the screening parameters, phenotype and motility.

448

449

450 **Discussion**

451 **Investigation of the DHB structure-activity relationship**

452 We previously identified a small hit series of five DHB compounds with activity against *T. muris*  
453 adult motility [18]. In medicinal chemistry, it is important to understand how variations in the  
454 structure of the compound affect activity, as this allows us to discover the critical aspects of the  
455 compound for target binding, with the overall aim of increasing potency as well as improving  
456 physicochemical properties. We therefore embarked upon a systematic, structure-activity relationship  
457 investigation, taking advantage of the convenient synthesis of the DHBs, which allowed us to  
458 systematically alter the four cyclic components of this class of compounds. A total of 47 variant  
459 compounds were synthesised in this work.

460 This work has enabled us to define certain essential features of the anti-whipworm DHB compounds.  
461 The 4-pyridyl ring (cycle D in Fig 1) must be in the 7 position, unlike the analogues **OX03701** and  
462 **OX03707**. The amide moiety of the oxazepinone ring must be as in **OX02983**, and not as in  
463 **OX03704**. The oxazepinone nitrogen can be substituted with methylbenzyl, cyclohexyl and *p*-  
464 trifluoromethylbenzyl (**OX02983**, **OX02993**, and **OX03144**), but not methyl, cyclopropyl, or benzyl  
465 groups. We also investigated in detail the replacement of cycle B. We found that removal of the  
466 oxygen from the DHB core was also consistent with similar activity to **OX02983** – the  
467 dihydrobenzoquinolinone compounds **OX03699** and **OX04236** had EC<sub>50</sub> values of 21 and 42 µM  
468 respectively.

469 **Targeting multiple helminth species with DHB family members**

470 Despite being unable to improve efficacy against *Trichuris* substantially through structural  
471 modifications, we were able to demonstrate activity of our compounds against other helminth  
472 parasites. In drug discovery for NTDs, pan-anthelmintic activity is desirable given that polyparasitism  
473 in the target population is the norm. Thus, being able to target multiple species of helminths with a  
474 single drug administered via mass drug administration programmes is of significant benefit. Of  
475 particular note was the commonality in DHB compounds active against *T. muris* that were also active  
476 against the tissue dwelling nematode parasite *B. malayi*. The ability of the DHB compounds to act  
477 against different clades within the nematode phylum is not unprecedented, indeed the co-  
478 administration of albendazole with ivermectin is currently advocated for control of *Trichuris*, and the  
479 same drug combination (in some situations supplemented with diethylcarbamazine) is widely used  
480 against lymphatic filariasis [46]. Indeed, the large-scale efforts to treat lymphatic filariasis have  
481 indirectly enhanced the number of people being treated for soil transmitted helminths [56]. Similarly,  
482 the alternative drug combination of albendazole and moxidectin is also being explored for the  
483 treatment of Trichuriasis given that moxidectin is an approved treatment for onchocerciasis [57].

484 In contrast, there are currently no drugs used in MDA that have demonstrated cross-phyla efficacy  
485 against both schistosomes and nematodes. Currently only praziquantel is used for preventative  
486 chemotherapy against schistosomes, although co-administration with albendazole is recommended  
487 where STHs are co-endemic [58]. Therefore it was notable that DHB family members could work  
488 across phyla, showing some activity against both schistosomes and nematodes.

## 489 Conclusions

490 In this study we have investigated the structure-activity relationship of the DHB compounds, defined  
491 essential features for anthelmintic action, and broadened the active series by the discovery of  
492 dihydrobenzoquinolinone compounds with activity against *T. muris* adult motility. We have also  
493 demonstrated that DHB and related compounds have activity against multiple helminths across  
494 different phyla – against the nematodes *B. malayi* and *H. polygyrus* as well as *T. muris*, and against  
495 the trematode *S. mansoni*. What we have not achieved however, is the substantive improvement in  
496 potency from the 20-50  $\mu$ M range that would be desirable to progress this series with confidence to *in*

497 *vivo* testing. Open science, where information is disclosed more freely than in traditional models, is  
498 proposed to accelerate drug discovery and make it more cost efficient, especially in the context of  
499 neglected diseases [59,60]. We have therefore decided to report our progress at this point. We note  
500 that we do not yet know the target of the DHB/DBQ compounds in helminths. Identifying this target  
501 may facilitate the boost in activity we are striving for.

502

## 503 **Acknowledgments**

504 JDT, MJT and AEM were supported by a National Centre for Replacement, Refinement and  
505 Reduction of Animals in Research Studentship (NC3R Studentship NC/M00175X/1) and a Bill and  
506 Melinda Gates Foundation award to the Liverpool School of Tropical Medicine (BMGF  
507 OPP1054324).

508 FAP and DBS are supported by Medical Research Council grant MR/N024842/1 and a  
509 UCL/Wellcome Trust Translational Partnership Pilot Grant.

510 JFT, HW and KFH acknowledge the Welsh Government Life Sciences Research Network Wales and  
511 the Wellcome Trust Pathfinder (201008/Z/16/Z) schemes for financial support of the Roboworm  
512 platform.

513

## 514 **References**

- 515 1. GBD 2017 Disease and Injury Incidence and Prevalence Collaborators. Global, regional, and  
516 national incidence, prevalence, and years lived with disability for 354 diseases and injuries for  
517 195 countries and territories, 1990–2017: a systematic analysis for the Global Burden of Disease  
518 Study 2017. *Lancet*. 2018;392: 1789–1858. doi:10.1016/S0140-6736(18)32279-7
- 519 2. Kyu HH, Abate D, Abate KH, Abay SM, Abbafati C, Abbasi N, et al. Global, regional, and  
520 national disability-adjusted life-years (DALYs) for 359 diseases and injuries and healthy life  
521 expectancy (HALE) for 195 countries and territories, 1990–2017: a systematic analysis for the  
522 Global Burden of Disease Study 2017. *The Lancet*. 2018;392: 1859–1922. doi:10.1016/S0140-  
523 6736(18)32335-3

- 524 3. World Health Organization. 2030 targets for soil-transmitted helminthiasis control programmes.  
525 2020 [cited 21 Apr 2020]. Available:  
526 [http://www.who.int/intestinal\\_worms/resources/9789240000315/en/](http://www.who.int/intestinal_worms/resources/9789240000315/en/)
- 527 4. Palmeirim MS, Ame SM, Ali SM, Hattendorf J, Keiser J. Efficacy and Safety of a Single Dose  
528 versus a Multiple Dose Regimen of Mebendazole against Hookworm Infections in Children: A  
529 Randomised, Double-blind Trial. *EClinicalMedicine*. 2018;1: 7–13.  
530 doi:10.1016/j.eclinm.2018.06.004
- 531 5. Keiser J, Utzinger J. Efficacy of current drugs against soil-transmitted helminth infections:  
532 Systematic review and meta-analysis. *JAMA*. 2008;299: 1937–1948.  
533 doi:10.1001/jama.299.16.1937
- 534 6. Moser W, Schindler C, Keiser J. Drug Combinations Against Soil-Transmitted Helminth  
535 Infections. *Adv Parasitol*. 2019;103: 91–115. doi:10.1016/bs.apar.2018.08.002
- 536 7. Barda B, Ame SM, Ali SM, Albonico M, Puchkov M, Huwyler J, et al. Efficacy and tolerability  
537 of moxidectin alone and in co-administration with albendazole and tribendimidine versus  
538 albendazole plus oxantel pamoate against *Trichuris trichiura* infections: a randomised, non-  
539 inferiority, single-blind trial. *Lancet Infect Dis*. 2018;18: 864–873. doi:10.1016/S1473-  
540 3099(18)30233-0
- 541 8. Speich B, Ame SM, Ali SM, Alles R, Huwyler J, Hattendorf J, et al. Oxantel Pamoate–  
542 Albendazole for *Trichuris trichiura* Infection. *New England Journal of Medicine*. 2014;370:  
543 610–620. doi:10.1056/NEJMoa1301956
- 544 9. Speich B, Ali SM, Ame SM, Bogoch II, Alles R, Huwyler J, et al. Efficacy and safety of  
545 albendazole plus ivermectin, albendazole plus mebendazole, albendazole plus oxantel pamoate,  
546 and mebendazole alone against *Trichuris trichiura* and concomitant soil-transmitted helminth  
547 infections: a four-arm, randomised controlled trial. *The Lancet Infectious Diseases*. 2015;15:  
548 277–284. doi:10.1016/S1473-3099(14)71050-3
- 549 10. Speich B, Moser W, Ali SM, Ame SM, Albonico M, Hattendorf J, et al. Efficacy and reinfection  
550 with soil-transmitted helminths 18-weeks post-treatment with albendazole-ivermectin,  
551 albendazole-mebendazole, albendazole-oxantel pamoate and mebendazole. *Parasit Vectors*.  
552 2016;9: 123. doi:10.1186/s13071-016-1406-8
- 553 11. Moser W, Schindler C, Keiser J. Efficacy of recommended drugs against soil transmitted  
554 helminths: systematic review and network meta-analysis. *BMJ*. 2017;358: j4307.  
555 doi:10.1136/bmj.j4307
- 556 12. Diawara A, Drake LJ, Suswillo RR, Kihara J, Bundy DAP, Scott ME, et al. Assays to Detect  $\beta$ -  
557 Tubulin Codon 200 Polymorphism in *Trichuris trichiura* and *Ascaris lumbricoides*. *PLoS Negl*  
558 *Trop Dis*. 2009;3: e397. doi:10.1371/journal.pntd.0000397
- 559 13. Diawara A, Halpenny CM, Churcher TS, Mwandawiro C, Kihara J, Kaplan RM, et al.  
560 Association between Response to Albendazole Treatment and  $\beta$ -Tubulin Genotype Frequencies  
561 in Soil-transmitted Helminths. *PLoS Negl Trop Dis*. 2013;7: e2247.  
562 doi:10.1371/journal.pntd.0002247
- 563 14. Vlaminck J, Cools P, Albonico M, Ame S, Chanthapaseuth T, Viengxay V, et al. Piloting a  
564 surveillance system to monitor the global patterns of drug efficacy and the emergence of  
565 anthelmintic resistance in soil-transmitted helminth control programs: a Starworms study  
566 protocol. *Gates Open Res*. 2020;4: 28. doi:10.12688/gatesopenres.13115.1

- 567 15. Elfawal MA, Savinov SN, Aroian RV. Drug Screening for Discovery of Broad-spectrum Agents  
568 for Soil-transmitted Nematodes. *Sci Rep*. 2019;9: 12347. doi:10.1038/s41598-019-48720-1
- 569 16. Hurst RJ, Hopwood T, Gallagher AL, Partridge FA, Burgis T, Sattelle DB, et al. An antagonist  
570 of the retinoid X receptor reduces the viability of *Trichuris muris* in vitro. *BMC Infectious*  
571 *Diseases*. 2014;14: 520. doi:10.1186/1471-2334-14-520
- 572 17. Keiser J, Panic G, Adelfio R, Cowan N, Vargas M, Scandale I. Evaluation of an FDA approved  
573 library against laboratory models of human intestinal nematode infections. *Parasit Vectors*.  
574 2016;9: 376. doi:10.1186/s13071-016-1616-0
- 575 18. Partridge FA, Murphy EA, Willis NJ, Bataille CJR, Forman R, Heyer-Chauhan N, et al.  
576 Dihydrobenz[e][1,4]oxazepin-2(3H)-ones, a new anthelmintic chemotype immobilising  
577 whipworm and reducing infectivity *in vivo*. *PLoS Negl Trop Dis*. 2017;11: e0005359.  
578 doi:10.1371/journal.pntd.0005359
- 579 19. Partridge FA, Forman R, Willis NJ, Bataille CJR, Murphy EA, Brown AE, et al. 2,4-  
580 Diaminothieno[3,2-*d*]pyrimidines, a new class of anthelmintic with activity against adult and  
581 egg stages of whipworm. *PLoS Negl Trop Dis*. 2018;12: e0006487.  
582 doi:10.1371/journal.pntd.0006487
- 583 20. Preston S, Jiao Y, Baell JB, Keiser J, Crawford S, Koehler AV, et al. Screening of the “Open  
584 Scaffolds” collection from Compounds Australia identifies a new chemical entity with  
585 anthelmintic activities against different developmental stages of the barber’s pole worm and  
586 other parasitic nematodes. *Int J Parasitol Drugs Drug Resist*. 2017;7: 286–294.  
587 doi:10.1016/j.ijpddr.2017.05.004
- 588 21. Tyagi R, Maddirala AR, Elfawal M, Fischer C, Bulman CA, Rosa BA, et al. Small Molecule  
589 Inhibitors of Metabolic Enzymes Repurposed as a New Class of Anthelmintics. *ACS Infect Dis*.  
590 2018;4: 1130–1145. doi:10.1021/acsinfecdis.8b00090
- 591 22. Weeks JC, Roberts WM, Leasure C, Suzuki BM, Robinson KJ, Currey H, et al. Sertraline,  
592 Paroxetine, and Chlorpromazine Are Rapidly Acting Anthelmintic Drugs Capable of Clinical  
593 Repurposing. *Sci Rep*. 2018;8: 975. doi:10.1038/s41598-017-18457-w
- 594 23. World Health Organization. Ending the neglect to attain the Sustainable Development Goals: A  
595 road map for neglected tropical diseases 2021–2030. World Health Organization; 2020.  
596 Available: [http://www.who.int/neglected\\_diseases/resources/who-ucn-ntd-2020.01/en/](http://www.who.int/neglected_diseases/resources/who-ucn-ntd-2020.01/en/)
- 597 24. Boussinesq M, Fobi G, Kuesel AC. Alternative treatment strategies to accelerate the elimination  
598 of onchocerciasis. *Int Health*. 2018;10: i40–i48. doi:10.1093/inthealth/ihx054
- 599 25. Taylor MJ, Hoerauf A, Townson S, Slatko BE, Ward SA. Anti-*Wolbachia* drug discovery and  
600 development: safe macrofilaricides for onchocerciasis and lymphatic filariasis. *Parasitology*.  
601 2014;141: 119–127. doi:10.1017/S0031182013001108
- 602 26. Sahputra R, Ruckerl D, Couper KN, Muller W, Else KJ. The Essential Role Played by B Cells  
603 in Supporting Protective Immunity Against *Trichuris muris* Infection Is by Controlling the  
604 Th1/Th2 Balance in the Mesenteric Lymph Nodes and Depends on Host Genetic Background.  
605 *Front Immunol*. 2019;10: 2842. doi:10.3389/fimmu.2019.02842
- 606 27. Wakelin D. Acquired immunity to *Trichuris muris* in the albino laboratory mouse. *Parasitology*.  
607 1967;57: 515–524. doi:10.1017/s0031182000072395

- 608 28. Partridge FA, Brown AE, Buckingham SD, Willis NJ, Wynne GM, Forman R, et al. An  
609 automated high-throughput system for phenotypic screening of chemical libraries on *C. elegans*  
610 and parasitic nematodes. *International Journal for Parasitology: Drugs and Drug Resistance*.  
611 2018;8: 8–21. doi:10.1016/j.ijpddr.2017.11.004
- 612 29. Buckingham SD, Partridge FA, Poulton BC, Miller BS, McKendry RA, Lycett GJ, et al.  
613 Automated phenotyping of mosquito larvae enables high-throughput screening for novel  
614 larvicides and smartphone-based detection of larval insecticide resistance. *bioRxiv*. 2020;  
615 2020.07.20.211946. doi:10.1101/2020.07.20.211946
- 616 30. Buckingham SD, Partridge FA, Sattelle DB. Automated, high-throughput, motility analysis in  
617 *Caenorhabditis elegans* and parasitic nematodes: Applications in the search for new  
618 anthelmintics. *International Journal for Parasitology: Drugs and Drug Resistance*. 2014;4: 226–  
619 232. doi:10.1016/j.ijpddr.2014.10.004
- 620 31. Ritz C, Baty F, Streibig JC, Gerhard D. Dose-Response Analysis Using R. *PLOS ONE*.  
621 2015;10: e0146021. doi:10.1371/journal.pone.0146021
- 622 32. Pionnier N, Sjoberg H, Furlong-Silva J, Marriott A, Halliday A, Archer J, et al. Eosinophil-  
623 Mediated Immune Control of Adult Filarial Nematode Infection Can Proceed in the Absence of  
624 IL-4 Receptor Signaling. *The Journal of Immunology*. 2020;205: 731–740.  
625 doi:10.4049/jimmunol.1901244
- 626 33. Turner JD, Pionnier N, Furlong-Silva J, Sjoberg H, Cross S, Halliday A, et al. Interleukin-4  
627 activated macrophages mediate immunity to filarial helminth infection by sustaining CCR3-  
628 dependent eosinophilia. *PLOS Pathogens*. 2018;14: e1006949.  
629 doi:10.1371/journal.ppat.1006949
- 630 34. Geyer KK, Niazi UH, Duval D, Cosseau C, Tomlinson C, Chalmers IW, et al. The  
631 *Biomphalaria glabrata* DNA methylation machinery displays spatial tissue expression, is  
632 differentially active in distinct snail populations and is modulated by interactions with  
633 *Schistosoma mansoni*. *PLoS Negl Trop Dis*. 2017;11: e0005246.  
634 doi:10.1371/journal.pntd.0005246
- 635 35. Colley DG, Wikel SK. *Schistosoma mansoni*: simplified method for the production of  
636 schistosomules. *Exp Parasitol*. 1974;35: 44–51. doi:10.1016/0014-4894(74)90005-8
- 637 36. Crusco A, Bordoni C, Chakroborty A, Whatley KCL, Whiteland H, Westwell AD, et al. Design,  
638 synthesis and anthelmintic activity of 7-keto-sempervirrol analogues. *Eur J Med Chem*.  
639 2018;152: 87–100. doi:10.1016/j.ejmech.2018.04.032
- 640 37. Paveley RA, Mansour NR, Hallyburton I, Bleicher LS, Benn AE, Mikic I, et al. Whole  
641 Organism High-Content Screening by Label-Free, Image-Based Bayesian Classification for  
642 Parasitic Diseases. *PLOS Neglected Tropical Diseases*. 2012;6: e1762.  
643 doi:10.1371/journal.pntd.0001762
- 644 38. Zhang J, Chung T, Oldenburg K. A Simple Statistical Parameter for Use in Evaluation and  
645 Validation of High Throughput Screening Assays. *J Biomol Screen*. 1999;4: 67–73.  
646 doi:10.1177/108705719900400206
- 647 39. Johns BA, Velthuisen EJ, Weatherhead JG. Tetrahydroisoquinoline derivatives.  
648 WO2017093938A1, 2017. Available: <https://patents.google.com/patent/WO2017093938A1/fi>
- 649 40. Zhao XZ, Metifiot M, Smith SJ, Maddali K, Marchand C, Hughes SH, et al. 6,7-  
650 Dihydroxyisoindolin-1-one and 7,8-Dihydroxy-3,4-Dihydroisoquinolin- 1(2H)-one Based HIV-

- 651 1 Integrase Inhibitors. *Curr Top Med Chem.* 2016;16: 435–440.  
652 doi:10.2174/1568026615666150813150058
- 653 41. Shen J, Xiong B, Zhao Y, Li J, Geng M, Ma L, et al. 1,2,3,4-Tetrahydroisoquinolin-1(H)-one  
654 and 1(2H)-phthalazinone derivatives as histone deacetylase inhibitors and their preparation,  
655 pharmaceutical compositions and use in the treatment of cancer. *CN107879975A*, 2018.
- 656 42. Lee T, Alvarado JR, Tian J, Meyers KM, Han C, Mills JJ, et al. Wdr5 inhibitors and modulators.  
657 *WO2020086857A1*, 2020.
- 658 43. Tian J, Teuscher KB, Aho ER, Alvarado JR, Mills JJ, Meyers KM, et al. Discovery and  
659 Structure-Based Optimization of Potent and Selective WD Repeat Domain 5 (WDR5) Inhibitors  
660 Containing a Dihydroisoquinolinone Bicyclic Core. *J Med Chem.* 2020;63: 656–675.  
661 doi:10.1021/acs.jmedchem.9b01608
- 662 44. Opoku NO, Bakajika DK, Kanza EM, Howard H, Mambandu GL, Nyathirombo A, et al. Single  
663 dose moxidectin versus ivermectin for *Onchocerca volvulus* infection in Ghana, Liberia, and the  
664 Democratic Republic of the Congo: a randomised, controlled, double-blind phase 3 trial. *Lancet.*  
665 2018;392: 1207–1216. doi:10.1016/S0140-6736(17)32844-1
- 666 45. King CL, Suamani J, Sanuku N, Cheng Y-C, Satofan S, Mancuso B, et al. A Trial of a Triple-  
667 Drug Treatment for Lymphatic Filariasis. *New England Journal of Medicine.* 2018.  
668 doi:10.1056/NEJMoal706854
- 669 46. World Health Organization. Guideline: Alternative mass drug administration regimens to  
670 eliminate lymphatic filariasis. 2017. Available:  
671 [http://whqlibdoc.who.int/publications/2011/9789241501811\\_eng.pdf](http://whqlibdoc.who.int/publications/2011/9789241501811_eng.pdf)
- 672 47. Kuesel AC. Research for new drugs for elimination of onchocerciasis in Africa. *Int J Parasitol*  
673 *Drugs Drug Resist.* 2016;6: 272–286. doi:10.1016/j.ijpddr.2016.04.002
- 674 48. Vercruyse J, Albonico M, Behnke JM, Kotze AC, Prichard RK, McCarthy JS, et al. Is  
675 anthelmintic resistance a concern for the control of human soil-transmitted helminths?  
676 *International Journal for Parasitology: Drugs and Drug Resistance.* 2011;1: 14–27.  
677 doi:10.1016/j.ijpddr.2011.09.002
- 678 49. Wang W, Wang L, Liang Y-S. Susceptibility or resistance of praziquantel in human  
679 schistosomiasis: a review. *Parasitol Res.* 2012;111: 1871–1877. doi:10.1007/s00436-012-3151-z
- 680 50. Taylor MJ, Hoerauf A, Bockarie M. Lymphatic filariasis and onchocerciasis. *The Lancet.*  
681 2010;376: 1175–1185. doi:10.1016/S0140-6736(10)60586-7
- 682 51. Blaxter ML, Ley PD, Garey JR, Liu LX, Scheldeman P, Vierstraete A, et al. A molecular  
683 evolutionary framework for the phylum Nematoda. *Nature.* 1998;392: 71–75.  
684 doi:10.1038/32160
- 685 52. Behnke JM, Menge DM, Noyes H. *Heligmosomoides bakeri*: a model for exploring the biology  
686 and genetics of resistance to chronic gastrointestinal nematode infections. *Parasitology.*  
687 2009;136: 1565–1580. doi:10.1017/S0031182009006003
- 688 53. Crellen T, Walker M, Lamberton PHL, Kabatereine NB, Tukahebwa EM, Cotton JA, et al.  
689 Reduced Efficacy of Praziquantel Against *Schistosoma mansoni* Is Associated With Multiple  
690 Rounds of Mass Drug Administration. *Clin Infect Dis.* 2016;63: 1151–1159.  
691 doi:10.1093/cid/ciw506

- 692 54. Kuntz AN, Davioud-Charvet E, Sayed AA, Califf LL, Dessolin J, Arnér ESJ, et al. Thioredoxin  
693 Glutathione Reductase from *Schistosoma mansoni*: An Essential Parasite Enzyme and a Key  
694 Drug Target. PLOS Med. 2007;4: e206. doi:10.1371/journal.pmed.0040206
- 695 55. Whatley KCL, Padalino G, Whiteland H, Geyer KK, Hulme BJ, Chalmers IW, et al. The  
696 repositioning of epigenetic probes/inhibitors identifies new anti-schistosomal lead compounds  
697 and chemotherapeutic targets. PLOS Neglected Tropical Diseases. 2019;13: e0007693.  
698 doi:10.1371/journal.pntd.0007693
- 699 56. Farrell SH, Coffeng LE, Truscott JE, Werkman M, Toor J, de Vlas SJ, et al. Investigating the  
700 Effectiveness of Current and Modified World Health Organization Guidelines for the Control of  
701 Soil-Transmitted Helminth Infections. Clin Infect Dis. 2018;66: S253–S259.  
702 doi:10.1093/cid/ciy002
- 703 57. Keller L, Palmeirim MS, Ame SM, Ali SM, Puchkov M, Huwyler J, et al. Efficacy and Safety  
704 of Ascending Dosages of Moxidectin and Moxidectin-albendazole Against *Trichuris trichiura*  
705 in Adolescents: A Randomized Controlled Trial. Clin Infect Dis. 2020;70: 1193–1201.  
706 doi:10.1093/cid/ciz326
- 707 58. World Health Organization. Preventive chemotherapy in human helminthiasis. Coordinated use  
708 of anthelmintic drugs in control interventions: a manual for health professionals and  
709 programme managers. 2006. Available: <https://apps.who.int/iris/handle/10665/43545>
- 710 59. Partridge FA, Forman R, Bataille CJR, Wynne GM, Nick M, Russell AJ, et al. Anthelmintic  
711 drug discovery: target identification, screening methods and the role of open science. Beilstein J  
712 Org Chem. 2020;16: 1203–1224. doi:10.3762/bjoc.16.105
- 713 60. Todd MH. Six Laws of Open Source Drug Discovery. ChemMedChem. 2019;14: 1804–1809.  
714 doi:10.1002/cmdc.201900565
- 715
- 716



717 **Supporting information Captions**

718 **S1 File. Supporting information for synthetic chemistry**

719 **S2 File. Summary table of compound structures and assay results.** Shaded results are those  
720 compounds that were active in each assay.

721
